# 1 $\mu$ -Lat: A Mouse Model to Evaluate 2 Human Immunodeficiency Virus 3 Eradication Strategies

4 Hannah S. Sperber<sup>1,2,3\*</sup>, Padma Priya Togarrati<sup>1\*</sup>, Kyle A. Raymond<sup>1,3</sup>, Mohamed  
5 S. Bouzidi<sup>1,3</sup>, Renata Gilfanova<sup>1</sup>, Alan G. Gutierrez<sup>1</sup>, Marcus O. Muench<sup>1,3</sup>, and  
6 Satish K. Pillai<sup>1,3+</sup>

7 <sup>1</sup>Vitalant Research Institute, San Francisco, California, United States of America

8 <sup>2</sup>Free University of Berlin, Institute of Biochemistry, Berlin, Germany

9 <sup>3</sup>University of California, San Francisco, California, United States of America

10 \*These authors contributed equally

11 +Corresponding author, e-mail: [satish.pillai@ucsf.edu](mailto:satish.pillai@ucsf.edu)

12

13

## 14 Nonstandard abbreviations

| ABBREVIATION | DEFINITION                                                                                |
|--------------|-------------------------------------------------------------------------------------------|
| ART          | antiretroviral therapy                                                                    |
| BM           | bone marrow                                                                               |
| GFP          | green fluorescence reporter                                                               |
| GVHD         | graft versus host disease                                                                 |
| HIV          | human Immunodeficiency virus                                                              |
| HSC          | hematopoietic stem cell                                                                   |
| IEL          | intraepithelial lymphocytes                                                               |
| LN           | lymph node                                                                                |
| LRA          | latency reversal agent                                                                    |
| LTR          | long terminal repeats                                                                     |
| MFI          | mean fluorescence intensity                                                               |
| NHP          | nonhuman primates                                                                         |
| NSG          | NOD.Cg-Prkdc <sup>scid</sup> Il2rg <sup>tm1Wjl</sup> /SzJ                                 |
| NSG-3GS      | NOD.Cg-Prkdc <sup>scid</sup> Il2rg <sup>tm1Wjl</sup>   Tg(CMV-IL3,CSF2,KITLG)1Eav/MloySzJ |
| PBMC         | peripheral blood mononuclear cell                                                         |
| PMA          | phorbol-myristate-acetate                                                                 |
| r.-o.        | retro-orbital                                                                             |
| SCID         | Severe combined immunodeficiency                                                          |
| SIV          | simian immunodeficiency virus                                                             |
| TNF          | tumor necrosis factor                                                                     |

15

16

17 **Abstract**

18 A critical barrier to the development of a human immunodeficiency virus (HIV) cure is the lack  
19 of a scalable animal model that enables robust evaluation of eradication approaches prior to  
20 testing in humans. We established a humanized mouse model of latent HIV infection by  
21 transplanting “J-Lat” cells, Jurkat cells harboring a latent HIV provirus encoding an enhanced  
22 green fluorescent protein (GFP) reporter, into irradiated adult NOD.Cg-Prkdc<sup>scid</sup> Il2rg<sup>tm1Wjl</sup>/SzJ  
23 (NSG) mice. J-Lat cells exhibited successful engraftment in several tissues including spleen, bone  
24 marrow, peripheral blood, and lung, in line with the diverse natural tissue tropism of HIV.  
25 Administration of tumor necrosis factor (TNF)- $\alpha$ , an established HIV latency reversal agent,  
26 significantly induced GFP expression in engrafted cells across tissues, reflecting viral  
27 reactivation. These data suggest that our murine latency (“ $\mu$ -Lat”) model enables efficient  
28 determination of how effectively viral eradication agents, including latency reversal agents,  
29 penetrate and function in diverse anatomical sites harboring HIV *in vivo*.

30

31 Keywords: Humanized mouse, HIV, HIV latency, latency reversal, shock and kill, antiviral gene  
32 therapy

33

## 34 Introduction

35 The advent of antiretroviral therapy (ART) has dramatically reduced morbidity and mortality for  
36 human immunodeficiency virus (HIV)-infected individuals with access to healthcare in resource-  
37 rich countries. However, despite years of potent therapy, eradication of infection is not  
38 achieved due to the persistence of HIV latently-infected cells during treatment(1).  
39 Accumulating evidence suggest that “non-AIDS” cardiovascular, renal and hepatic diseases are  
40 amplified by HIV infection, and the immune system may exhibit premature senescence even  
41 among patients with complete viral suppression(2). Moreover, although enormous progress has  
42 been made to provide ART in resource-limited settings, there are huge economic, political and  
43 operational challenges to reach the goal of universal access to lifelong treatment. These  
44 realities have created a pronounced interest in developing HIV cure strategies.

45 A number of approaches to achieve a sterilizing or functional cure for HIV infection are  
46 currently under investigation, including therapeutic vaccination, immunomodulatory  
47 approaches, therapeutic HIV latency reversal (the “shock and kill” strategy), as well as a number  
48 of gene therapy approaches(3,4). In all scenarios, it will be critical to have proper diagnostic  
49 tools and models in place to comprehensively evaluate performance and safety prior to  
50 deployment in a clinical setting. A critical barrier to the development of an HIV cure is the lack  
51 of an accessible and scalable preclinical animal model that enables robust evaluation of  
52 candidate eradication approaches prior to testing in humans(5). As a result, many promising  
53 curative approaches never graduate past the petri dish stage. Infection of nonhuman primates  
54 (NHP) with simian immunodeficiency virus (SIV) is an option and has been utilized extensively to  
55 study HIV/AIDS pathogenesis(6,7). Recent advancements have been made in optimizing ART

56 regimens to achieve durable virus suppression and thus enable evaluation of HIV cure  
57 strategies in the SIV-NHP model(8–10). However, biological limitations remain since this model  
58 uses SIV and might not recapitulate human host-HIV interactions and HIV latency  
59 mechanisms(11–15). In addition, NHP experiments involve complex ethical considerations, and  
60 the high costs and labor requirements only allow small numbers of animals to be utilized in any  
61 given trial, limiting statistical power and generalizability(11).

62 Mouse models represent another alternative with lower costs, more convenient husbandry  
63 requirements, as well as greater scalability. In the context of HIV studies, a wide range of small  
64 animal models have been developed comprising knockout mouse (16–18), transgenic  
65 mouse(19–23), and humanized mouse models(6,24–29). Humanized mice are established by  
66 xenotransplantation of human cells or tissues in immunodeficient mouse strains. Most strains  
67 used in HIV research are derivatives of severe combined immunodeficient (SCID) mice, which  
68 harbor mutations in the gene coding for a DNA-dependent protein kinase catalytic subunit  
69 (Prkdc). These mice are “humanized” using two approaches: 1) human cells are injected with or  
70 without prior irradiation of mice or 2) portions of tissue are surgically implanted. Different cells  
71 have been used for injection, including human peripheral blood mononuclear cells (PBMCs), as  
72 in the *hu-PBL-SCID* mouse model(30), obtained from healthy(31) or HIV-infected ART  
73 suppressed individuals(32), or human hematopoietic stem cells (HSCs), as in the *hu-HSC* mouse  
74 model(33), or the more recently developed *T-cell-only*(34) and *myeloid-only*(35) mouse models  
75 (*ToM* and *MoM*). Implantation of fetal thymus and liver tissue fragments are used for the *SCID-*  
76 *hu thy/liv*(36,37) and *bone marrow/liver/thymus* (BLT)(38,39) mouse models. Although all these  
77 model systems have contributed to our understanding of HIV pathogenesis and persistence, key

78 limitations remain that need to be addressed in order to fully exploit the potential of these  
79 small animal models in HIV cure research. *Hu-PBL-SCID* mice struggle with the development of  
80 graft versus host disease (GVHD) which renders this model inapplicable for long-term studies  
81 involving HIV persistence. The generation of *SCID-hu thy/liv* and BLT mice is limited due to the  
82 need for surgical implantation and a limited supply of tissue. Moreover, these models as well as  
83 *hu-HSC*, *ToM* and *MoM* mice rely on the engraftment of cells or tissues typically derived from  
84 human fetal specimens, which in light of recent changes in U.S. federal policies face significant  
85 challenges, as ethical, legal, and political considerations surrounding the use of fetal tissue in  
86 scientific research have made it increasingly difficult to obtain such material(40). A major  
87 limitation shared by all these models remains the low frequency of HIV latently-infected cells,  
88 which impacts the applicability of these models as robust *in vivo* test bases for HIV cure  
89 strategies.

90 In the present study, we therefore pursued a new approach and transplanted J-Lat 11.1 cells (J-  
91 Lat cells) into irradiated adult NOD.Cg-*Prkdc*<sup>scid</sup> *Il2rg*<sup>tm1Wjl</sup>/SzJ (NSG) mice. J-Lat cell clones have  
92 been derived from Jurkat cells, an immortalized human T lymphocyte cell line. Each cell harbors  
93 a single latent HIV provirus encoding an enhanced green fluorescent protein (GFP) reporter in  
94 place of the *nef* gene(41). The proviruses within the J-Lat clones are typically latent due to  
95 epigenetic repression(42) and were selected to be responsive to TNF- $\alpha$  stimulation, resulting in  
96 viral LTR-driven GFP expression. J-Lat 11.1 cells were chosen for this model as they displayed  
97 the greatest viral reactivation upon TNF- $\alpha$  treatment in cell culture settings with respect to  
98 other clones(43). Our data show robust engraftment of J-Lat cells in several tissues three weeks  
99 after injection as well as significant reactivation of these latently-infected cells *in vivo* upon

100 intravenous administration of the established latency reversal agent (LRA) tumor necrosis  
101 factor (TNF)- $\alpha$ . By applying an established and widely-utilized HIV latency reporter cell  
102 line(41,43,44), we circumvent the need for fetal or any other donor-derived tissue, and achieve  
103 high frequencies of HIV latently-infected cells *in vivo* on a short experimental time scale. In  
104 addition, the presence of the GFP reporter cassette in the integrated viral genome provides for  
105 quick and convenient assessment of viral reactivation using flow cytometry or microscopy.  
106 Moreover, by taking advantage of an HIV reporter cell line, our murine latency ( $\mu$ -Lat) model  
107 represents a highly reproducible platform that allows for a simple transition from *in vitro*  
108 screening approaches to an *in vivo* system enabling the evaluation of bioavailability and  
109 pharmacokinetics of candidate regimens. Although not intended to serve as a pathophysiology  
110 model, we present this approach as a scalable, accessible, and cost-effective preclinical testbed  
111 to evaluate the safety, tolerability, and performance of HIV cure strategies in distinct  
112 anatomical niches.

113

## 114 **Materials and Methods**

115 **Cell culture and treatment:** J-Lat 11.1 cells (kindly provided by Dr. Eric Verdin) contain an  
116 integrated latent full-length HIV genome harboring a mutation in the *env* gene and GFP in place  
117 of the *nef* gene as a reporter for transcriptional activity of the provirus(45). J-Lat 11.1 cells were  
118 grown in media composed of RPMI 1640 (Gibco) supplemented with 10% fetal bovine serum  
119 (FBS) (Corning) and 1% Penicillin-Streptomycin (Gibco). Cells were cultured at 37°C in a  
120 humidified incubator containing 5% CO<sub>2</sub>. To test the potency of latency reversal agents (LRAs), 1  
121 x 10<sup>6</sup> cells in 1 ml RPMI were left untreated (negative control), incubated in 0.5% DMSO (vehicle  
122 control), 20 nM PMA/1 μM Ionomycin (positive control) or 20 ng/μl TNF-α for 24h.

123 **Mice:** The work was approved by the Institutional Animal Care and Use Committee guidelines  
124 at Covance Laboratories, Inc. (San Carlos, CA) under Animal Welfare Assurance A3367-01 and  
125 protocol number IAC 2185 / ANS 2469. Animal husbandry was carried out according to the  
126 recommendations in the Guide for the Care and Use of Laboratory Animals of the National  
127 Institutes of Health. Mice were sacrificed in accordance with the guidelines from the American  
128 Veterinary Medical Association.

129 Adult female and male mice (≥8 weeks old) were included in this study and were maintained at  
130 Vitalant Research Institute (VRI). Breeding pairs of NSG mice were obtained from Jackson  
131 Laboratories (Bar Harbor, ME), and were bred and maintained at VRI in a vivarium free from  
132 >40 murine pathogens as determined through biannual nucleic acid testing (Mouse Surveillance  
133 Plus PRIA; Charles River) of sentinel mice exposed to mixed bedding. Mice were maintained in  
134 sterile, disposable microisolator cages (Innovive, Inc.), which were changed every 14 days.



135 Environmental enrichment was provided by autoclaved cotton Nestlets (Ancare Corp.) and GLP-  
136 certified Bio-Huts (Bio-Serv). Feed consisted of sterile, irradiated diet of Teklad Global 19%  
137 protein diet (Envigo) with free access to sterile-filtered, acidified water (Innovive, Inc.). Several  
138 days prior to radiation and 3 weeks following radiation, mice were fed with irradiated Global  
139 2018 rodent diet with 4100 ppm Uniprim® (Envigo).

140 **J-Lat cell surface marker staining:** For each staining,  $1 \times 10^6$  J-Lat cells were washed once with  
141 PBS (Gibco), resuspended in 100  $\mu$ l PBS, and stained with Zombie dye (Cat. #423105,  
142 BioLegend) according to manufacturer's protocol (1:100 dilution) to enable subsequent  
143 discrimination between live and dead cells. 10 min after incubation with the Zombie dye,  
144 human CD45-PE (clone HI30, Cat. #304039, BioLegend), CD4-PE (clone OKT4, Cat. #317410,  
145 BioLegend), TCR  $\alpha/\beta$ -PE (clone IP26, Cat. #306708, BioLegend), CD27-PE (clone M-T271, Cat.  
146 #356406, BioLegend), CD147-APC (clone HIM6, Cat. #306214, BioLegend), CD29-APC (clone  
147 TS2/16, Cat. #303008, BioLegend), and HLA-ABC-APC/Cy7 (clone W6/32, Cat. #311426,  
148 BioLegend) antibodies were added respectively, and were incubated for another 20-30 min at  
149 room temperature (RT) in the dark. Cells were then washed with 2 ml of cell staining buffer  
150 (Cat. #420201, BioLegend), resuspended in 300  $\mu$ l PBS and measured using an LSR II flow  
151 cytometer (BD Biosciences). Respective Isotype stained samples were used as control. At least  
152 10,000 events were recorded for each sample.

153 **J-Lat cell transplantation into mice:** If not otherwise stated, J-Lat cell transplantation was  
154 performed as follows: mice were irradiated with 175 cGy radiation dose using a RS2000 X-Ray  
155 Biological Irradiator (RAD Source Technologies, Inc.) 3 hours prior to cell transplantation. Mice  
156 were transplanted with  $10 \times 10^6$  J-Lat cells in a volume of 200  $\mu$ l by tail vein injection. J-Lat cell

157 transplanted mice as well as control mice (left untransplanted) were sacrificed and analyzed  
158 within 25 days of cell transplantation.

159 **Engraftment analysis of J-Lat cells in mice by flow cytometry:** Transplanted mice were  
160 sacrificed by cervical dislocation 3 weeks post injection (or as indicated in figure legends). In  
161 one experiment, BM, brain, gut, intraepithelial lymphocytes (IEL) from gut tissue, heart, spleen,  
162 lung, lymph nodes, and PB were harvested. In subsequent experiments, selected tissues were  
163 harvested including BM, spleen, lung, and PB. Single cell suspensions from the BM, spleen, and  
164 PB were prepared as described previously by Beyer et al.(46). Brain, gut, heart, lymph node,  
165 and lung specimens were processed as follows: after harvest, all samples were stored in PBS on  
166 ice. Brain and lymph node specimens were washed twice in PBS, brain specimens additionally  
167 cut into small fragments (3-4 mm<sup>2</sup>), followed by mashing the tissue fragments with a pestle and  
168 passaging the cell suspensions through 70 µm cell strainers. Gut, heart, and lung specimens  
169 were washed twice with PBS and then cut into 3-4 mm<sup>2</sup> pieces in a petri dish in 1 ml digestion  
170 solution consisting of 1 mg/ml DE Collagenase (Cat. #011-1040, VitaCyte) and 100 U/ml DNase I  
171 (Cat. #D5025-15KU, Sigma-Aldrich) final concentration in HBSS (Gibco). Fragments were  
172 transferred to 50 ml falcon tubes, digestion solution was added to a final volume of up to 5 ml,  
173 and samples were incubated at 37°C for 30 min (gut, heart) or 50 min (lung). IEL from gut tissue  
174 were isolated as supernatant after digestion incubation. Afterwards, up to 5 ml of stop solution,  
175 consisting of 0.5% BSA (Cat. #A2153, MilliPoreSigma) and 2 mM EDTA (Cat. #E0306, Teknova)  
176 final concentration in PBS, was added to each sample to end the enzymatic digestion reaction.  
177 Single cell suspensions were prepared by passage through a 70 µm cell strainer and washed  
178 with PBS. For the analysis of J-Lat cell engraftment, single cells from harvested mouse tissues

179 were stained with human CD147-APC or human CD147-APC combined with human CD29-APC,  
180 and additional Pacific Blue conjugate, mouse-specific lineage markers including CD45-Pacific  
181 Blue (clone 30-F11, Cat. #103126, BioLegend), TER-119-Pacific Blue (clone TER-119, Cat.  
182 #116232, BioLegend), and H-2K<sup>D</sup>-Pacific Blue antibodies (clone SF1-1.1, Cat. #116616,  
183 BioLegend). Cells were incubated for 30 min at RT in the dark. Zombie dye staining detected in  
184 the APC-Cy7 channel was used for discrimination of live and dead cells. Following staining, cells  
185 were washed and run on an LSR II flow cytometer, where at least 10,000 events were recorded  
186 per sample. Flow cytometry data were analyzed using FlowJo software (FlowJo, Inc.).

187 **Treatment of J-Lat engrafted mice with latency reversal agent TNF- $\alpha$ :** Mice engrafted with J-  
188 Lat cells were treated with recombinant human TNF- $\alpha$  (Cat. #PHC3011, Gibco), a potent and  
189 well-known LRA. Briefly, NSG mice were transplanted with J-Lat cells and 3 weeks post-  
190 transplantation, mice received TNF- $\alpha$  (diluted in 200  $\mu$ l PBS) intravenously at a dose of  
191 20  $\mu$ g/mouse(47). NSG mice injected with J-Lat cells and treated with PBS were used as vehicle  
192 control group.

193 After 24h of TNF- $\alpha$  treatment, mice were sacrificed to determine viral reactivation in PB, BM,  
194 lung and spleen tissues. Latency reversal of the HIV provirus was analyzed by comparing GFP  
195 expression of J-Lat cells in tissues of TNF- $\alpha$  treated mice vs the vehicle control group. GFP  
196 expression of engrafted J-Lat cells was determined by flow cytometry as described above.

197 **Data analysis:** All data were analyzed using GraphPad Prism version 8.2 and are presented as  
198 mean  $\pm$  the standard error of the mean (SEM). Applied statistical tests and analyses are  
199 described in figure legends. A P value of  $\leq 0.05$  was considered as statistically significant.  
200 Individual P values are indicated in figures.

## 202 **Results**

203 **The human cell surface proteins CD147 and CD29 enable discrimination of J-Lat cells from**  
204 **mouse cells.** Our model involves transplantation of J-Lat cells (immortalized human T cells  
205 harboring a latent HIV provirus with a GFP reporter reflecting viral transcriptional activity) into  
206 irradiated adult NSG mice(41). We therefore searched for cell surface markers that identify  
207 engrafted J-Lat cells in a background of mouse cells, exhibiting three key features: 1) universal  
208 expression across J-Lat cells, 2) high per-cell expression on J-Lat cells, and 3) absence of  
209 expression on the surface of mouse cells.

210 Our candidate panel included seven cell surface proteins commonly known to be expressed in  
211 human CD4+ T cells: CD45, CD4, TCR  $\alpha/\beta$ , CD27, CD147, CD29, and HLA-ABC. Four of these cell  
212 surface proteins were found to be expressed universally among the J-Lat population: CD45,  
213 CD147, CD29 and HLA-ABC (**Figure 1A**). The mean fluorescence intensity (MFI) of the four  
214 proteins was measured, reflecting the relative abundance of each protein on the cell surface.  
215 CD147 exhibited the highest MFI, followed by CD29 (**Figure 1B**). We next tested if the CD29 and  
216 CD147 antibodies (both APC conjugated to achieve maximum signal to noise ratio in the APC-  
217 channel) showed detectable binding to mouse cells obtained from different tissues. We  
218 harvested bone marrow (BM), lung, brain, gut, intraepithelial lymphocytes (IEL) from gut tissue,  
219 lymph nodes, heart and spleen from an untransplanted control mouse. In addition, based on  
220 Hoggatt et al.(48), who reported that blood parameters such as cell composition significantly  
221 varied depending on sampling manner and site, we performed peripheral blood (PB) harvest in  
222 three different ways: by retro-orbital bleed (r.-o.), tail vein bleed, or heart bleed. Human CD29

223 and CD147 staining was combined with antibodies targeting the mouse-specific lineage markers  
224 CD45, TER-119, and H-2K<sup>d</sup> for a positive identification of mouse cells. While 100% of cultured J-  
225 Lat cells expressed CD29 and CD147 and were negative for mouse-specific markers (**Figure 1C**),  
226 the frequency of CD147<sup>+</sup>/CD29<sup>+</sup> cells was negligible or absent across mouse tissues (**Figure 1D**  
227 **and E**). Most tissues harbored no CD147<sup>+</sup>/CD29<sup>+</sup> cells, while 0.06% CD147<sup>+</sup>/CD29<sup>+</sup> cells were  
228 detected in the lung and 1.37% CD147<sup>+</sup>/CD29<sup>+</sup> cells were detected in PB upon heart bleed  
229 (**Figure 1E**). For both samples, lung and PB heart bleed, these percentages represent a single  
230 event detected to be positive for CD147/CD29 (**Figure 1D and E**). Thus, we concluded that  
231 among the tested cell surface proteins, human CD147 combined with CD29 function as a  
232 specific marker pair for the identification of J-Lat cells engrafted in mouse tissues.

233 **Establishment and optimization of J-Lat cell engraftment in humanized mice.** In the context of  
234 establishing a humanized mouse model, we examined and optimized several parameters  
235 simultaneously to achieve a highly reproducible and robust *in vivo* platform (**Figure 2**).

236 In the following pilot experiments, we focused on J-Lat cell engraftment in the BM (**Figure 3**). To  
237 measure the kinetics of J-Lat cell engraftment, we harvested the BM at different time points  
238 post J-Lat cell injection (**Figure 3A**). We examined the effect of varying cell doses (**Figure 3B**)  
239 and irradiation of recipient mice (**Figure 3C**) on J-Lat cell engraftment levels, and compared  
240 engraftment levels in NOD.Cg-Prkdc<sup>scid</sup> Il2rg<sup>tm1Wj</sup>/Tg(CMV-IL3,CSF2,KITLG)1Eav/MloySzJ (NSG-  
241 3GS) and NSG mice (**Figure 3D**). We detected J-Lat cells in the BM 18 days post cell injection  
242 (pci), and detection levels reached a significant increase 25 days pci compared to 1 and 3 days  
243 pci with an average of 16.3±8.6% engrafted J-Lat cells (**Figure 3A**). Using a J-Lat cell injection  
244 dose of 10 x 10<sup>6</sup> J-Lat cells compared to 5 x 10<sup>6</sup> J-Lat cells per mouse led to a higher but not

245 significant increase in engraftment levels in the BM of nonirradiated NSG-3GS mice (**Figure 3B**).  
246 Nonirradiated NSG-3GS recipient mice harbored lower frequencies of engrafted J-Lat cells in  
247 the BM compared to irradiated NSG-3GS recipient mice (**Figure 3C**). Again, this difference was  
248 not significant but showed a slight increase in J-Lat cell engraftment levels when recipient mice  
249 were irradiated. Finally, when testing engraftment levels in different mouse strains, we found  
250 significantly higher numbers of J-Lat cells in NSG mice (**Figure 3D**). J-Lat cell engraftment levels  
251 in the BM 3 weeks pci of  $10 \times 10^6$  J-Lat cells were 2.4 fold higher in NSG mice compared to NSG-  
252 3GS mice (**Figure 3D**). Based on our results, we concluded that irradiation of recipient NSG mice  
253 and a cell dose of  $10 \times 10^6$  J-Lat cells per mouse administered through intravenous injection  
254 resulted in efficient and reproducible cell engraftment levels which peaked 3 weeks following  
255 cell transplantation.

256 **J-Lat cells engraft successfully in several tissues in transplanted NSG mice.** Using the  
257 determined experimental conditions, we investigated J-Lat cell engraftment in several tissues,  
258 as listed above, that we harvested from 5 irradiated NSG mice 3 weeks pci (**Figure 4**). To  
259 analyze the expression of J-Lat and mouse markers on cells obtained from different mouse  
260 tissues, we followed the gating strategy as described before (see **Figure 1C** and **Figure 4A** and  
261 **B**). J-Lat cell engraftment levels were evaluated based on the frequency, MFI, and the absolute  
262 number of CD147<sup>+</sup>/CD29<sup>+</sup> cells in the respective processed tissues (**Figure 4C-E** and  
263 **Supplementary Figure 1**). We found engrafted J-Lat cells in several tissues including the BM,  
264 lung, spleen, and PB (**Figure 4A** and **B**). The mean frequency of engrafted J-Lat cells varied  
265 across tissues from approximately 30% in the BM to 0.7% in the spleen (**Figure 4C**). While the  
266 MFI of the engrafted J-Lat cells was comparable within and across tissues (**Figure 4D**), the

267 absolute number of engrafted J-Lat cells varied drastically. We detected the highest J-Lat cell  
268 amount in the BM, followed by the amount in the lung and then the spleen (**Figure 4E**). We did  
269 not detect engrafted J-Lat cells in the gut, IEL from the gut or heart tissues (**Figure 4C-E**).  
270 Processing brain and lymph node tissues yielded only low overall cell numbers that were  
271 evaluable (**Supplementary Figure 1A and B**). While J-Lat cells were identified in processed brain  
272 tissues at high frequency (**Supplementary Figure 1C**), the actual number of engrafted J-Lat cells  
273 was on average 5 cells (**Supplementary Figure 1E**). We thus decided to exclude the brain in  
274 subsequent experiments due to the low overall cell numbers. We did not detect engrafted J-Lat  
275 cells in the lymph node (**Supplementary Figure 1B-E**). When focusing on engraftment in the PB,  
276 we found that heart and r.-o. bleed yielded a substantial higher frequency of engrafted J-Lat  
277 cells compared to tail vein bleed (**Figure 4C**). However, PB harvest by r.-o. bleeding showed the  
278 highest MFI, and more importantly, the highest absolute number of engrafted J-Lat cells (**Figure**  
279 **4D and E**). Taken together, we found different engraftment levels based on the sample  
280 collection method as observed by Hoggatt et al.(48). Thus, due to considerable engraftment  
281 levels and practicality of collection, we decided to harvest PB in subsequent experiments via r.-  
282 o. bleeding.

283 Based on these results and parameter thresholds applied in concert (frequency > 0.005; MFI >  
284 15,000; absolute number > 10), we focused in subsequent experiments on J-Lat engraftment in  
285 the BM, lung, spleen and PB via r.-o. bleed and established a suitable engraftment and sample  
286 collection protocol to drive the model.

287 **J-Lat cells maintain low GFP expression upon engraftment in selected tissues.** Once we  
288 confirmed reproducible and robust engraftment in several tissues, we wanted to investigate

289 GFP expression levels of engrafted J-Lat cells. As described before, the GFP reporter integrated  
290 into the latent provirus in J-Lat cells is under the control of the proviral LTR and thus reflects  
291 viral transcriptional activity. High GFP expression levels would thus indicate spontaneous viral  
292 reactivation *in vivo* and render the model inapplicable for testing LRAs. We measured J-Lat cell  
293 engraftment levels and GFP background signal of engrafted J-Lat cells in the selected tissues  
294 (BM, lung, spleen, PB r.-o.) of 10 NSG mice 3 weeks pci (**Figure 5**). We applied our previously  
295 described gating strategy to identify engrafted J-Lat cells based on CD147/CD29 expression and  
296 measured GFP signal within this compartment (**Figure 5A-C**). Engraftment of J-Lat cells was  
297 detected in the BM, lung, spleen, and PB r.-o. as observed before (**Figure 5D**). Across these  
298 tissues, GFP expression levels of engrafted J-Lat cells remained low and frequencies did not  
299 exceed an average of 4% GFP-positive cells (**Figure 5E**). The results showed that while these  
300 mouse tissues harbored substantial levels of HIV latently-infected cells *in vivo*, engraftment of J-  
301 Lat cells in the tested tissues did not lead to spontaneous reactivation of viral transcription.

302 **TNF- $\alpha$  treatment induces GFP expression in tissue engrafted J-Lat cells reflecting reactivation**  
303 **of latent provirus *in vivo*.** Finally, we sought to determine if HIV LRA administration would  
304 result in viral reactivation *in vivo*. Viral reactivation was measured based on the frequency of  
305 GFP expressing cells within engrafted J-Lat cells following LRA treatment (**Figure 6A**).

306 The proviruses within the J-Lat family of clones were selected to be responsive to TNF- $\alpha$   
307 stimulation, resulting in viral LTR-driven GFP expression(41). Previous studies have shown, that  
308 among the established clones, J-Lat 11.1 cells displayed greatest viral reactivation upon TNF- $\alpha$   
309 treatment in cell culture settings(43). 24h *in vitro* treatment of J-Lat cells with 20 ng/ $\mu$ l TNF- $\alpha$   
310 resulted in a significant increase of GFP-positive cells compared to mock-treated (0.5% DMSO)



311 and untreated cells, which were largely GFP-negative (**Figure 6B**). Therefore, we performed *in*  
312 *vivo* reactivation experiments using 20 µg of TNF-α as an LRA (with PBS as a vehicle  
313 control)(47). 24h following TNF-α tail vein injection, effects on tissue engraftment and  
314 reactivation of latent provirus were estimated in a cross-sectional manner at necropsy,  
315 comparing 9 animals treated with TNF-α versus 10 vehicle control animals. J-Lat cell  
316 engraftment and GFP expression of J-Lat cells were analyzed as described in **Figure 5A**. Analyses  
317 of all tissues demonstrated no significant effect of TNF-α treatment on J-Lat cell engraftment  
318 levels within the respective compartment (**Figure 6C**). However, TNF-α treatment did lead to  
319 significant increases in the frequency of GFP-positive cells as well as GFP MFI among engrafted  
320 J-Lat cells (**Figure 6D-F**). Comparing the two populations (TNF-α vs vehicle control)  
321 demonstrated a GFP expression fold-change of 3.2 in the BM, 17.8 in the spleen, 11.7 in the  
322 lung, and 12.7 in the PB, illustrating potent and significant viral reactivation.

323

## 324 **Discussion**

325 The development of an HIV cure will be accelerated by the deployment of a convenient and  
326 cost-effective animal model that enables the determination of an agent's therapeutic efficacy  
327 as it permeates through tissue-specific barriers and the circulatory, respiratory and excretory  
328 systems. We present a novel humanized mouse model of HIV latency that aims to address this  
329 gap. In this study, we established a reliable method to discriminate between J-Lat and mouse  
330 cells (**Figure 1** and **Figure 4**) and demonstrated robust engraftment of these cells in multiple  
331 tissues sites (**Figure 4** and **Figure 5**). Significant viral reactivation was observed in TNF- $\alpha$ -treated  
332 animals with respect to vehicle control-treated animals (**Figure 6D-F**). Importantly, although *in*  
333 *vivo* treatment with TNF- $\alpha$  induced GFP expression and thus viral reactivation by 3.2 (BM), 17.8  
334 (spleen), 11.7 (lung), and 12.7 (PB) -fold compared to vehicle control treated animals (**Figure**  
335 **6E**), TNF- $\alpha$  treatment *in vitro* induced a 25.3-fold increase in GFP expressing cells (**Figure 6B**).  
336 Moreover, the observed variability in TNF- $\alpha$ -mediated viral reactivation across tissue sites  
337 demonstrates that the efficacy of latency reversal approaches can differ dramatically between  
338 distinct anatomical niches due to pharmacokinetic factors and drug penetration efficiencies.  
339 These data emphasize the importance of testing the efficacies of promising and potent  
340 regimens in an *in vivo* system, and reinforce the relevance of the  $\mu$ -Lat model.

341 Although not intended to serve as a pathophysiology model, the  $\mu$ -Lat platform offers key  
342 advantages over existing preclinical models focused on HIV eradication. Firstly, the model is  
343 highly efficient; the timeframe to generate mouse colonies that are ready for administration of  
344 experimental therapies is approximately three weeks. In comparison, even the simplified  
345 humanized mouse model introduced by Kim et al.(31) requires four weeks for robust

346 engraftment of intraperitoneally injected human PBMCs in NSG mice and an additional 5 weeks  
347 of incubation upon HIV infection. Secondly, the presence of the GFP reporter cassette in the  
348 integrated J-Lat viral genome allows for rapid and convenient assessment of HIV latency  
349 reversal *in vivo*, eliminating the requirement for PCR or culture-based diagnostics to determine  
350 LRA potency. Thirdly, the model is characterized by high frequencies of HIV latently-infected  
351 cells (e.g. in some experiments exceeding 30% engraftment in BM), and these cells are  
352 distributed in a number of relevant anatomical sites that are central to HIV persistence. This  
353 stands in contrast to organoid-based models (e.g. the *SCID-hu thy/liv* mouse model) that  
354 exclusively involves viral colonization within a xenografted tissue(49). Lastly, the model is highly  
355 scalable due to the low costs and limited labor requirements of the method involving the easily  
356 and widely available J-Lat cell line (provided free of charge via the NIH AIDS Reagent Program).  
357 Importantly, the clonal nature of cell lines promotes consistency and high reproducibility across  
358 laboratories, while allowing for an easy transition from the petri-dish stage to an *in vivo*  
359 evaluation system.

360 Similar to other animal models, there are caveats associated with the  $\mu$ -Lat model. Although  
361 the GFP reporter present within the J-Lat cell conveniently broadcasts transactivation of the  
362 viral LTR and induction of viral transcription (informative precursor steps that may lead to the  
363 production of viral antigen and release of virus), other assays will need to be applied to the  $\mu$ -  
364 Lat model to specifically quantify viral production or clearance of infected cells mediated by a  
365 candidate HIV eradication agent. In addition, the efficiency of the model is largely driven by the  
366 administration of an HIV latently-infected cell line, rather than differentiated primary cells. As  
367 presented here, a single latent clone with a single proviral integration site was injected into

368 mice. Proviral integration site is known to affect viral latency and responsiveness to LRA  
369 administration(4,50–52). However, this issue could be ameliorated by mixing different HIV  
370 latently-infected cell clones at specific ratios, thereby achieving higher integration site  
371 heterogeneity to more accurately represent *in vivo* variability. For instance, there are 11 J-Lat  
372 clones currently available via the NIH AIDS Reagent Program, each of which is characterized by  
373 a distinct proviral integration site. These clones often behave differently from each other as  
374 well when exposed to LRAs *in vitro*, likely reflecting a diversity of molecular mechanisms  
375 reinforcing viral latency across clones(43). This mechanistic diversity could further enhance the  
376 predictive potential of the  $\mu$ -Lat model.

377 Beyond concerns regarding integration site heterogeneity, the immortalized nature of the J-Lat  
378 cell line may impact molecular and regulatory pathways that affect HIV latency. However, the  
379 widespread usage of the J-Lat model and its derivative clones to examine viral latency and to  
380 evaluate the efficacy of HIV cure strategies *in vitro* speak to the model's utility(53–62). Ample  
381 data from primary cell-based models of latency and experiments involving *ex vivo*  
382 administration of LRAs to cells obtained from HIV-infected individuals on ART suggest that  
383 differences between applied models and between individuals can have dramatic effects on the  
384 establishment, maintenance, and reversal of HIV latency(43,63,64). Moreover, profiling of HIV  
385 latency in multiple tissue sites has demonstrated that the nature of viral latency may even vary  
386 extensively within a single infected individual(65–67). Therefore, it needs to be considered that  
387 any applied model system or cells from any given individual may introduce biases that impact  
388 generalizability, just as a cell line-based system(26).

389 Our work described here represents a proof of concept, demonstrating that the engraftment of  
390 a cell line-based model of HIV latency may constitute a useful testbed for HIV cure strategies.  
391 This general approach is highly versatile and should allow for a broad range of infected cell  
392 types to be examined *in vivo*. For example, HIV latency in the myeloid compartment is likely  
393 critical to viral persistence(35,68–71), and multiple reports suggest this compartment may  
394 respond quite differently to curative approaches, as compared to lymphoid reservoirs(72,73). It  
395 may be fruitful to inject the U1 HIV chronically-infected promonocytic cell line(74) into NSG  
396 mice to examine LRA responses in myeloid cells. Building further on the myeloid theme, the  
397 central nervous system (CNS) compartment is an important viral sanctuary site in the setting of  
398 ART(73,75–78), and HIV eradication approaches will almost certainly face unique challenges in  
399 this niche(78,79). As direct injection of human cells into the murine CNS has been used  
400 successfully as an engraftment approach(80–84), site-specific injection of the recently  
401 developed HC69.5 HIV latently-infected microglial cell line(85,86) into the brains of NSG mice  
402 may provide a convenient platform to gauge CNS-focused cure strategies.

403 Beyond preclinical investigation of LRAs, the  $\mu$ -Lat framework may provide a convenient model  
404 system to evaluate gene therapy-based HIV eradication approaches. Gene therapy approaches  
405 targeting HIV infection generally fall into two categories: 1) Gene editing can be used to target  
406 or “excise” the HIV provirus directly in infected cells as an eradication approach(87,88) or 2)  
407 Editing can be used to modulate host cells to render them refractory to HIV infection and/or  
408 potentiate antiviral immune responses(89). In the former case, *in vivo* delivery of the gene  
409 therapy modality will likely be necessary to pervasively attack the HIV reservoir within a broad  
410 range of tissue sites in infected individuals. The  $\mu$ -Lat model is well-suited to investigate gene

411 delivery in this context, as it is characterized by robust engraftment of HIV latently-infected  
412 cells into diverse anatomical niches. This will allow for efficient assessment of gene therapy  
413 vector dissemination and antiviral function across anatomic sites. The LTR-driven GFP cassette  
414 within the J-Lat integrated provirus may facilitate this assessment; direct targeting of the GFP  
415 sequence may be used to examine vector trafficking and delivery, while specific targeting of the  
416 HIV LTR as a cure approach would be associated with a convenient readout (relative loss of GFP  
417 expression upon induced latency reversal).

418 In summary, the  $\mu$ -Lat model is optimized for efficient and scalable evaluation of select HIV  
419 eradication approaches *in vivo*, allowing determination of therapeutic efficacy in addition to  
420 essential safety, tolerability, and pharmacokinetic parameters. Further development and  
421 diversification of the  $\mu$ -Lat model system may enable convenient testing of HIV eradication  
422 approaches, including antiviral gene therapy strategies, in a range of cell types and tissue sites  
423 *in vivo*.

424

## 425 **Acknowledgments**

426 This study was supported by the National Institutes of Health grants R01 AI150449 (SKP) and  
427 R01 MH112457 (SKP), and was additionally supported by a grant from the National Institutes of  
428 Health, University of California San Francisco-Gladstone Institute of Virology & Immunology  
429 Center for AIDS Research (P30 AI027763). We thank Dr. Roland Schwarzer for valuable input  
430 and careful review of the manuscript.

## 431 **Conflict of interest statement**

432 The authors have declared that no conflict of interest exists.

## 433 **Author contributions**

434 HSS, PPT, KAR, MSB conceived and performed experiments; PPT, RG, AGG, MOM performed *in*  
435 *vivo* experiments; HSS, PPT collected and analyzed the data; HSS, PPT, MOM, SKP designed the  
436 study and wrote the manuscript.

437

438

439

440

## 441 **References**

- 442 1. Wong JK, Hezareh M, Günthard HF, Havlir D V, Ignacio CC, Spina CA, et al. Recovery of  
443 replication-competent HIV despite prolonged suppression of plasma viremia. *Science*  
444 (80- ) [Internet]. 1997 Nov 14 [cited 2019 Nov 15];278(5341):1291–5. Available from:  
445 <http://www.ncbi.nlm.nih.gov/pubmed/9360926>
- 446 2. Piot P, Bartos M, Ghys PD, Walker N, Schwartländer B. The global impact of HIV/AIDS.  
447 *Nature* [Internet]. 2001 Apr 19 [cited 2019 Nov 15];410(6831):968–73. Available from:  
448 <http://www.nature.com/articles/35073639>
- 449 3. Pitman MC, Lau JSY, McMahon JH, Lewin SR. Barriers and strategies to achieve a cure for  
450 HIV. *Lancet HIV* [Internet]. 2018 Jun [cited 2019 Nov 15];5(6):e317–28. Available from:  
451 <https://linkinghub.elsevier.com/retrieve/pii/S0031938416312148>
- 452 4. Schwarzer, Gramatica, Greene. Reduce and Control: A Combinatorial Strategy for  
453 Achieving Sustained HIV Remissions in the Absence of Antiretroviral Therapy. *Viruses*  
454 [Internet]. 2020 Feb 8;12(2):188. Available from: [https://www.mdpi.com/1999-](https://www.mdpi.com/1999-4915/12/2/188)  
455 [4915/12/2/188](https://www.mdpi.com/1999-4915/12/2/188)
- 456 5. Policicchio BB, Pandrea I, Apetrei C. Animal Models for HIV Cure Research. *Front*  
457 *Immunol* [Internet]. 2016 Jan 28 [cited 2019 Nov 15];7(JAN):12. Available from:  
458 <http://www.ncbi.nlm.nih.gov/pubmed/26858716>
- 459 6. Nixon CC, Mavigner M, Silvestri G, Garcia JV. In vivo models of human immunodeficiency  
460 virus persistence and cure strategies. *J Infect Dis*. 2017;215(Suppl 3):S142–51.



- 461 7. Denton PW, Sogaard OS, Tolstrup M. Using animal models to overcome temporal, spatial  
462 and combinatorial challenges in HIV persistence research. *J Transl Med* [Internet]. 2016  
463 Dec 9;14(1):44. Available from: [http://www.translational-](http://www.translational-medicine.com/content/14/1/44)  
464 [medicine.com/content/14/1/44](http://www.translational-medicine.com/content/14/1/44)
- 465 8. Shytaj IL, Norelli S, Chirullo B, Della Corte A, Collins M, Yalley-Ogunro J, et al. A highly  
466 intensified ART regimen induces long-term viral suppression and restriction of the viral  
467 reservoir in a simian AIDS model. *PLoS Pathog*. 2012;8(6).
- 468 9. Dinoso JB, Rabi SA, Blankson JN, Gama L, Mankowski JL, Siliciano RF, et al. A Simian  
469 Immunodeficiency Virus-Infected Macaque Model To Study Viral Reservoirs That Persist  
470 during Highly Active Antiretroviral Therapy. *J Virol*. 2009;83(18):9247–57.
- 471 10. North TW, Higgins J, Deere JD, Hayes TL, Villalobos A, Adamson L, et al. Viral Sanctuaries  
472 during Highly Active Antiretroviral Therapy in a Nonhuman Primate Model for AIDS. *J*  
473 *Virol*. 2010;84(6):2913–22.
- 474 11. Kumar N, Chahroudi A, Silvestri G. Animal models to achieve an HIV cure. *Curr Opin HIV*  
475 *AIDS* [Internet]. 2016 Jul;11(4):432–41. Available from:  
476 <https://linkinghub.elsevier.com/retrieve/pii/S0031938416312148>
- 477 12. Sayah DM, Sokolskaja E, Berthoux L, Luban J. Cyclophilin A retrotransposition into TRIM5  
478 explains owl monkey resistance to HIV-1. *Nature* [Internet]. 2004 Jul 7;430(6999):569–  
479 73. Available from: <http://www.nature.com/articles/nature02777>
- 480 13. Mariani R, Chen D, Schröfelbauer B, Navarro F, König R, Bollman B, et al. Species-specific

- 481 exclusion of APOBEC3G from HIV-1 virions by Vif. *Cell*. 2003;114(1):21–31.
- 482 14. Baldauf HM, Pan X, Erikson E, Schmidt S, Daddacha W, Burggraf M, et al. SAMHD1  
483 restricts HIV-1 infection in resting CD4 + T cells. *Nat Med*. 2012;18(11):1682–7.
- 484 15. Manel N, Littman DR. Hiding in plain sight: How HIV evades innate immune responses.  
485 *Cell* [Internet]. 2011;147(2):271–4. Available from:  
486 <http://dx.doi.org/10.1016/j.cell.2011.09.010>
- 487 16. Rehwinkel J, Maelfait J, Bridgeman A, Rigby R, Hayward B, Liberatore RA, et al. SAMHD1-  
488 dependent retroviral control and escape in mice. *EMBO J* [Internet]. 2013;32(18):2454–  
489 62. Available from: <http://dx.doi.org/10.1038/emboj.2013.163>
- 490 17. Behrendt R, Schumann T, Gerbaulet A, Nguyen LA, Schubert N, Alexopoulou D, et al.  
491 Mouse SAMHD1 Has Antiretroviral Activity and Suppresses a Spontaneous Cell-Intrinsic  
492 Antiviral Response. *Cell Rep* [Internet]. 2013 Aug;4(4):689–96. Available from:  
493 <https://linkinghub.elsevier.com/retrieve/pii/S2211124713003999>
- 494 18. Wittmann S, Behrendt R, Eissmann K, Volkmann B, Thomas D, Ebert T, et al.  
495 Phosphorylation of murine SAMHD1 regulates its antiretroviral activity. *Retrovirology*.  
496 2015;12(1):1–15.
- 497 19. Seay K, Qi X, Zheng JH, Zhang C, Chen K, Dutta M, et al. Mice Transgenic for CD4-Specific  
498 Human CD4, CCR5 and Cyclin T1 Expression: A New Model for Investigating HIV-1  
499 Transmission and Treatment Efficacy. *PLoS One*. 2013;8(5).
- 500 20. Rahim MMA, Chrobak P, Hu C, Hanna Z, Jolicoeur P. Adult AIDS-Like Disease in a Novel

- 501 Inducible Human Immunodeficiency Virus Type 1 Nef Transgenic Mouse Model: CD4+ T-  
502 Cell Activation Is Nef Dependent and Can Occur in the Absence of Lymphopenia. Vol.  
503 83, *Journal of Virology*. 2009. p. 11830–46.
- 504 21. Hanna Z, Weng X, Kay DG, Poudrier J, Lowell C, Jolicoeur P. The Pathogenicity of Human  
505 Immunodeficiency Virus (HIV) Type 1 Nef in CD4C/HIV Transgenic Mice Is Abolished by  
506 Mutation of Its SH3-Binding Domain, and Disease Development Is Delayed in the Absence  
507 of Hck. Vol. 75, *Journal of Virology*. 2001. p. 9378–92.
- 508 22. Dickie P, Felser J, Eckhaus M, Bryant J, Silver J, Marinos N, et al. HIV-associated  
509 nephropathy in transgenic mice expressing HIV-1 genes. *Virology*. 1991;185(1):109–19.
- 510 23. Maung R, Hoefler MM, Sanchez AB, Sejbuk NE, Medders KE, Desai MK, et al. CCR5  
511 Knockout Prevents Neuronal Injury and Behavioral Impairment Induced in a Transgenic  
512 Mouse Model by a CXCR4-Using HIV-1 Glycoprotein 120. *J Immunol* [Internet]. 2014 Aug  
513 15;193(4):1895–910. Available from:  
514 <https://linkinghub.elsevier.com/retrieve/pii/S0031938416312148>
- 515 24. Marsden MD, Zack JA. Studies of retroviral infection in humanized mice. *Virology*  
516 [Internet]. 2015 May;479–480(1):297–309. Available from:  
517 <https://linkinghub.elsevier.com/retrieve/pii/S004268221500029X>
- 518 25. Victor Garcia J. Humanized mice for HIV and AIDS research. *Curr Opin Virol*. 2016;19:56–  
519 64.
- 520 26. Whitney JB, Brad Jones R. In Vitro and In Vivo Models of HIV Latency. In: Zhang L, Lewin

- 521 SR, editors. HIV Vaccines and Cure: The Path Towards Finding an Effective Cure and  
522 Vaccine [Internet]. Singapore: Springer Singapore; 2018. p. 241–63. Available from:  
523 [https://doi.org/10.1007/978-981-13-0484-2\\_10](https://doi.org/10.1007/978-981-13-0484-2_10)
- 524 27. Krishnakumar V, Durairajan SSK, Alagarasu K, Li M, Dash AP. Recent updates on mouse  
525 models for human immunodeficiency, influenza, and dengue viral infections. *Viruses*.  
526 2019;11(3).
- 527 28. Zhou J, Takahashi M, Burnett JC, Li S, Rossi JJ, Li H, et al. HIV Replication and Latency in a  
528 Humanized NSG Mouse Model during Suppressive Oral Combinational Antiretroviral  
529 Therapy. *J Virol*. 2018;92(7):e02118-17.
- 530 29. Lai F, Chen Q. Humanized mouse models for the study of infection and pathogenesis of  
531 human viruses. Vol. 10, *Viruses*. 2018. p. 1–17.
- 532 30. Mosier DE, Gulizia RJ, Baird SM, Wilson DB. Transfer of a functional human immune  
533 system to mice with severe combined immunodeficiency. *Nature*. 1988;335(6187):256–  
534 9.
- 535 31. Kim KCKCKCKC, Choi BS, Kim KCKCKCKC, Park KH, Lee HJ, Cho YK, et al. A Simple Mouse  
536 Model for the Study of Human Immunodeficiency Virus. *AIDS Res Hum Retroviruses*.  
537 2016;32(2):194–202.
- 538 32. Flerin NC, Bardhi A, Zheng JH, Korom M, Folkvord J, Kovacs C, et al. Establishment of a  
539 Novel Humanized Mouse Model To Investigate In Vivo Activation and Depletion of  
540 Patient-Derived HIV Latent Reservoirs. Silvestri G, editor. *J Virol* [Internet]. 2019 Jan

- 541 9;93(6):1–18. Available from: <http://jvi.asm.org/lookup/doi/10.1128/JVI.02051-18>
- 542 33. Lapidot T, Pflumio F, Doedens M, Murdoch B, Williams DE, Dick JE. Cytokine stimulation  
543 of multilineage hematopoiesis from immature human cells engrafted in SCID mice.  
544 *Science* (80- ) [Internet]. 1992;255(5048):1137–41. Available from:  
545 <https://science.sciencemag.org/content/255/5048/1137>
- 546 34. Honeycutt JB, Wahl A, Archin N, Choudhary S, Margolis D, Garcia J V. HIV-1 infection,  
547 response to treatment and establishment of viral latency in a novel humanized T cell-  
548 only mouse (TOM) model. *Retrovirology* [Internet]. 2013;10(1):1. Available from:  
549 *Retrovirology*
- 550 35. Honeycutt JB, Wahl A, Baker C, Spagnuolo RA, Foster J, Zakharova O, et al. Macrophages  
551 sustain HIV replication in vivo independently of T cells Find the latest version: [↗](#)  
552 Macrophages sustain HIV replication in vivo independently of T cells. *J Clin Invest.*  
553 2016;126(4):1353–66.
- 554 36. McCune J, Namikawa R, Kaneshima H, Shultz L, Lieberman M, Weissman I. The SCID-hu  
555 mouse: murine model for the analysis of human hematolymphoid differentiation and  
556 function. *Science* (80- ) [Internet]. 1988 Sep 23;241(4873):1632–9. Available from:  
557 <https://science.sciencemag.org/content/241/4873/1632>
- 558 37. Namikawa R, Weilbaecher KN, Kaneshima H, Yee EJ, McCune JM. Longterm human  
559 hematopoiesis in the SCID-hu mouse. *J Exp Med.* 1990;172(4):1055–63.
- 560 38. Lan P, Tonomura N, Shimizu A, Wang S, Yang YG. Reconstitution of a functional human

- 561 immune system in immunodeficient mice through combined human fetal thymus/liver  
562 and CD34+ cell transplantation. *Blood*. 2006;108(2):487–92.
- 563 39. Melkus MW, Estes JD, Padgett-Thomas A, Gatlin J, Denton PW, Othieno FA, et al.  
564 Humanized mice mount specific adaptive and innate immune responses to EBV and TSST-  
565 1. *Nat Med*. 2006;12(11):1316–22.
- 566 40. McCune JM, Weissman IL. The Ban on US Government Funding Research Using Human  
567 Fetal Tissues: How Does This Fit with the NIH Mission to Advance Medical Science for the  
568 Benefit of the Citizenry? [Internet]. Vol. 13, *Stem Cell Reports*. 2019 [cited 2019 Nov 19].  
569 p. 777–86. Available from: <http://www.ncbi.nlm.nih.gov/pubmed/31722191>
- 570 41. Jordan A, Bisgrove D, Verdin E. HIV reproducibly establishes a latent infection after acute  
571 infection of T cells in vitro. 2003 [cited 2017 Jun 26];22(8). Available from:  
572 <https://www.ncbi.nlm.nih.gov/pmc/articles/PMC154479/pdf/cdg188.pdf>
- 573 42. Stoszko M, De Crignis E, Rokx C, Khalid MM, Lungu C, Palstra RJ, et al. Small Molecule  
574 Inhibitors of BAF; A Promising Family of Compounds in HIV-1 Latency Reversal.  
575 *EBioMedicine* [Internet]. 2016;3:108–21. Available from:  
576 <http://dx.doi.org/10.1016/j.ebiom.2015.11.047>
- 577 43. Spina CA, Anderson J, Archin NM, Bosque A, Chan J, Famiglietti M, et al. An In-Depth  
578 Comparison of Latent HIV-1 Reactivation in Multiple Cell Model Systems and Resting  
579 CD4+ T Cells from Aviremic Patients. Emerman M, editor. *PLoS Pathog* [Internet]. 2013  
580 Dec 26;9(12):e1003834. Available from:  
581 <http://dx.plos.org/10.1371/journal.ppat.1003834>

- 582 44. Spivak AM, Planelles V. Novel Latency Reversal Agents for HIV-1 Cure. *Annu Rev Med*  
583 [Internet]. 2018 Jan 29 [cited 2018 Aug 15];69(1):421–36. Available from:  
584 <https://www.ncbi.nlm.nih.gov/pmc/articles/PMC5892446/>
- 585 45. Jordan A, Defechereux P, Verdin E. The site of HIV-1 integration in the human genome  
586 determines basal transcriptional activity and response to Tat transactivation. *EMBO J*.  
587 2001;20(7):1726–38.
- 588 46. Beyer AI, Muench MO. Comparison of human hematopoietic reconstitution in different  
589 strains of immunodeficient mice. *Stem Cells Dev*. 2017;26(2):102–12.
- 590 47. Slørdal L, Muench MO, Warren DJ, Moore MAS. Radioprotection by murine and human  
591 tumor-necrosis factor: Dose-dependent effects on hematopoiesis in the mouse. *Eur J*  
592 *Haematol*. 1989;43(5):428–34.
- 593 48. Hoggatt J, Hoggatt AF, Tate TA, Fortman J, Pelus LM. Bleeding the laboratory mouse: Not  
594 all methods are equal. *Exp Hematol* [Internet]. 2016;44(2):132-137.e1. Available from:  
595 <http://dx.doi.org/10.1016/j.exphem.2015.10.008>
- 596 49. Namikawa R, Kaneshima H, Lieberman M, Weissman IL, McCune JM. Infection of the  
597 SCID-hu mouse by HIV-1. *Science (80- )*. 1988;242(4886):1684–6.
- 598 50. Symons J, Cameron PU, Lewin SR. HIV integration sites and implications for maintenance  
599 of the reservoir. *Curr Opin HIV AIDS* [Internet]. 2018 Mar;13(2):152–9. Available from:  
600 <http://insights.ovid.com/crossref?an=01222929-201803000-00009>
- 601 51. Anderson EM, Maldarelli F. The role of integration and clonal expansion in HIV infection:

- 602 Live long and prosper 11 Medical and Health Sciences 1108 Medical Microbiology Ben  
603 Berkhout, Alexander Pasternak. *Retrovirology* [Internet]. 2018;15(1):1–22. Available  
604 from: <https://doi.org/10.1186/s12977-018-0448-8>
- 605 52. Maldarelli F, Wu X, Su L, Simonetti FR, Shao W, Hill S, et al. Specific HIV integration sites  
606 are linked to clonal expansion and persistence of infected cells. *Science* (80- ) [Internet].  
607 2014 Jul 11;345(6193):179–83. Available from:  
608 <https://www.sciencemag.org/lookup/doi/10.1126/science.1254194>
- 609 53. Abdel-Mohsen M, Chavez L, Tandon R, Chew GM, Deng X, Danesh A, et al. Human  
610 Galectin-9 Is a Potent Mediator of HIV Transcription and Reactivation. *PLoS Pathog*  
611 [Internet]. 2016;12(6):1–28. Available from:  
612 <http://dx.doi.org/10.1371/journal.ppat.1005677>
- 613 54. Jiang G, Mendes EA, Kaiser P, Wong DP, Tang Y, Cai I, et al. Synergistic Reactivation of  
614 Latent HIV Expression by Ingenol-3-Angelate, PEP005, Targeted NF- $\kappa$ B Signaling in  
615 Combination with JQ1 Induced p-TEFb Activation. *PLoS Pathog*. 2015;11(7):1–27.
- 616 55. Darcis G, Kula A, Bouchat S, Fujinaga K, Corazza F, Ait-Ammar A, et al. An In-Depth  
617 Comparison of Latency-Reversing Agent Combinations in Various In Vitro and Ex Vivo  
618 HIV-1 Latency Models Identified Bryostatin-1+JQ1 and Ingenol-B+JQ1 to Potently  
619 Reactivate Viral Gene Expression. *PLoS Pathog*. 2015;11(7):1–36.
- 620 56. Reuse S, Calao M, Kabeya K, Guiguen A, Gatot JS, Quivy V, et al. Synergistic activation of  
621 HIV-1 expression by deacetylase inhibitors and prostratin: Implications for treatment of  
622 latent infection. *PLoS One*. 2009;4(6).



- 623 57. Brogdon J, Ziani W, Wang X, Veazey RS, Xu H. In vitro effects of the small-molecule  
624 protein kinase C agonists on HIV latency reactivation. *Sci Rep* [Internet].  
625 2016;6(November):1–8. Available from: <http://dx.doi.org/10.1038/srep39032>
- 626 58. Chen D, Wang H, Aweya JJ, Chen Y, Chen M, Wu X, et al. HMBA Enhances Prostratin-  
627 Induced Activation of Latent HIV-1 via Suppressing the Expression of Negative Feedback  
628 Regulator A20/TNFAIP3 in NF- B Signaling. *Biomed Res Int*. 2016;2016.
- 629 59. Rochat MA, Schlaepfer E, Speck RF. Promising Role of Toll-Like Receptor 8 Agonist in  
630 Concert with Prostratin for Activation of Silent HIV. *J Virol*. 2017;91(4):1–21.
- 631 60. Klase Z, Yedavalli VSRKRK, Houzet L, Perkins M, Maldarelli F, Brenchley J, et al. Activation  
632 of HIV-1 from Latent Infection via Synergy of RUNX1 Inhibitor Ro5-3335 and SAHA. Luban  
633 J, editor. *PLoS Pathog* [Internet]. 2014 Mar 20;10(3):e1003997. Available from:  
634 <https://dx.plos.org/10.1371/journal.ppat.1003997>
- 635 61. Bouchat S, Delacourt N, Kula A, Darcis G, Van Driessche B, Corazza F, et al. Sequential  
636 treatment with 5-aza-2'-deoxycytidine and deacetylase inhibitors reactivates HIV -1 .  
637 *EMBO Mol Med*. 2016;8(2):117–38.
- 638 62. Kutsch O, Wolschendorf F, Planelles V. Facts and Fiction: Cellular Models for High  
639 Throughput Screening for HIV-1 Reactivating Drugs. *Curr HIV Res* [Internet]. 2011 Dec  
640 1;9(8):568–78. Available from:  
641 [http://www.eurekaselect.com/openurl/content.php?genre=article&issn=1570-](http://www.eurekaselect.com/openurl/content.php?genre=article&issn=1570-162X&volume=9&issue=8&spage=568)  
642 [162X&volume=9&issue=8&spage=568](http://www.eurekaselect.com/openurl/content.php?genre=article&issn=1570-162X&volume=9&issue=8&spage=568)

- 643 63. Bradley T, Ferrari G, Haynes BF, Margolis DM, Browne EP. Single-Cell Analysis of  
644 Quiescent HIV Infection Reveals Host Transcriptional Profiles that Regulate Proviral  
645 Latency. *Cell Rep* [Internet]. 2018 Oct;25(1):107-117.e3. Available from:  
646 <https://linkinghub.elsevier.com/retrieve/pii/S2211124718314505>
- 647 64. Telwatte S, Morón-López S, Aran D, Kim P, Hsieh C, Joshi S, et al. Heterogeneity in HIV  
648 and cellular transcription profiles in cell line models of latent and productive infection:  
649 implications for HIV latency. *Retrovirology* [Internet]. 2019;16(1):32. Available from:  
650 <https://doi.org/10.1186/s12977-019-0494-x>
- 651 65. Dahl V, Gisslen M, Hagberg L, Peterson J, Shao W, Spudich S, et al. An example of  
652 genetically distinct HIV type 1 variants in cerebrospinal fluid and plasma during  
653 suppressive therapy. *J Infect Dis*. 2014;209(10):1618–22.
- 654 66. T. Blackard J. HIV Compartmentalization: A Review on a Clinically Important  
655 Phenomenon. *Curr HIV Res*. 2012;10(2):133–42.
- 656 67. Telwatte S, Lee S, Somsouk M, Hatano H, Baker C, Kaiser P, et al. Gut and blood differ in  
657 constitutive blocks to HIV transcription, suggesting tissue-specific differences in the  
658 mechanisms that govern HIV latency. *PLoS Pathog*. 2018;14(11):1–28.
- 659 68. Thompson KA, Cherry CL, Bell JE, McLean CA. Brain cell reservoirs of latent virus in  
660 presymptomatic HIV-infected individuals. *Am J Pathol* [Internet]. 2011;179(4):1623–9.  
661 Available from: <http://dx.doi.org/10.1016/j.ajpath.2011.06.039>
- 662 69. Castellano P, Prevedel L, Valdebenito S, Eugenin EA. HIV infection and latency induce a

- 663 unique metabolic signature in human macrophages. *Sci Rep* [Internet]. 2019;9(1):1–14.  
664 Available from: <http://dx.doi.org/10.1038/s41598-019-39898-5>
- 665 70. Wong ME, Jaworowski A, Hearps AC. The HIV Reservoir in Monocytes and Macrophages.  
666 *Front Immunol* [Internet]. 2019 Jun 26;10(June). Available from:  
667 <https://www.frontiersin.org/article/10.3389/fimmu.2019.01435/full>
- 668 71. Gama L CJACVRACGSPDFEQSSEBBLMMPKBSMLMJMGFOS. Myeloid and CD4 T Cells  
669 Comprise the Latent Reservoir in Antiretroviral Therapy-Suppressed SIVmac251-Infected  
670 Macaques. Silvestri G, Bennink JR, editors. *MBio* [Internet]. 2019 Aug 20;10(4):1–19.  
671 Available from: <http://mbio.asm.org/lookup/doi/10.1128/mBio.01659-19>
- 672 72. Gray LR, On H, Roberts E, Lu HK, Moso MA, Raison JA, et al. Toxicity and in vitro activity  
673 of HIV-1 latency-reversing agents in primary CNS cells. *J Neurovirol* [Internet]. 2016 Aug  
674 4;22(4):455–63. Available from: <http://link.springer.com/10.1007/s13365-015-0413-4>
- 675 73. Hellmuth J, Valcour V, Spudich S. CNS reservoirs for HIV: implications for eradication. *J*  
676 *virus Erad* [Internet]. 2015;1(2):67–71. Available from:  
677 <http://www.ncbi.nlm.nih.gov/pubmed/26430703>[http://www.pubmedcentral.nih.gov](http://www.pubmedcentral.nih.gov/articlerender.fcgi?artid=PMC4586130)  
678 [v/articlerender.fcgi?artid=PMC4586130](http://www.pubmedcentral.nih.gov/articlerender.fcgi?artid=PMC4586130)
- 679 74. Folks TM, Justement J, Kinter A, Dinarello CA, Fauci AS, Folks TM, et al. Cytokine-Induced  
680 Expression of HIV-1 in a Chronically Infected Promonocyte Cell Line. *Science* (80- )  
681 [Internet]. 1987;238(4828):800–2. Available from: <https://www.jstor.org/stable/1700363>
- 682 75. Joseph SB, Arrildt KT, Sturdevant CB, Swanstrom R. HIV-1 target cells in the CNS. *J*

- 683 Neurovirol [Internet]. 2015 Jun 19;21(3):276–89. Available from:  
684 <http://link.springer.com/10.1007/s13365-014-0287-x>
- 685 76. Barat C, Proust A, Deshiere A, Leboeuf M, Drouin J, Tremblay MJ. Astrocytes sustain long-  
686 term productive HIV-1 infection without establishment of reactivable viral latency. *Glia*  
687 [Internet]. 2018 Jul [cited 2018 Aug 15];66(7):1363–81. Available from:  
688 <https://onlinelibrary.wiley.com/doi/abs/10.1002/glia.23310>
- 689 77. Edén A, Fuchs D, Hagberg L, Nilsson S, Spudich S, Svennerholm B, et al. HIV-1 Viral Escape  
690 in Cerebrospinal Fluid of Subjects on Suppressive Antiretroviral Treatment. *J Infect Dis.*  
691 2010;202(12):1819–25.
- 692 78. Churchill M, Nath A. Where does HIV hide? A focus on the central nervous system. *Curr*  
693 *Opin HIV AIDS* [Internet]. 2013 May;8(3):165–9. Available from:  
694 <http://content.wkhealth.com/linkback/openurl?sid=WKPTLP:landingpage&an=01222929>  
695 -201305000-00003
- 696 79. Nath A, Clements JE. Eradication of HIV from the brain: Reasons for pause. *Aids.*  
697 2011;25(5):577–80.
- 698 80. Tyor WR, Power C, Gendelman HE, Markham RB. A model of human immunodeficiency  
699 virus encephalitis in scid mice. *Proc Natl Acad Sci U S A.* 1993;90(18):8658–62.
- 700 81. Potula R, Poluektova L, Knipe B, Chrastil J, Heilman D, Dou H, et al. Inhibition of  
701 indoleamine 2,3-dioxygenase (IDO) enhances elimination of virus-infected macrophages  
702 in an animal model of HIV-1 encephalitis. *Blood.* 2005;106(7):2382–90.

- 703 82. Poluektova LY, Munn DH, Persidsky Y, Gendelman HE. Generation of Cytotoxic T Cells  
704 Against Virus-Infected Human Brain Macrophages in a Murine Model of HIV-1  
705 Encephalitis. *J Immunol* [Internet]. 2002 Apr 15;168(8):3941–9. Available from:  
706 <http://www.jimmunol.org/lookup/doi/10.4049/jimmunol.168.8.3941>
- 707 83. Poluektova L, Gorantla S, Faraci J, Birusingh K, Dou H, Gendelman HE. Neuroregulatory  
708 Events Follow Adaptive Immune-Mediated Elimination of HIV-1-Infected Macrophages:  
709 Studies in a Murine Model of Viral Encephalitis. *J Immunol* [Internet]. 2004 Jun  
710 15;172(12):7610–7. Available from:  
711 <http://www.jimmunol.org/lookup/doi/10.4049/jimmunol.172.12.7610>
- 712 84. Persidsky Y, Limoges J, McComb R, Bock P, Baldwin T, Tyor W, et al. Human  
713 immunodeficiency virus encephalitis in SCID mice. *Am J Pathol*. 1996;149(3):1027–53.
- 714 85. Garcia-Mesa Y, Jay TR, Checkley MA, Luttge B, Dobrowolski C, Valadkhan S, et al.  
715 Immortalization of primary microglia: a new platform to study HIV regulation in the  
716 central nervous system. *J Neurovirol* [Internet]. 2017 [cited 2018 Sep 5];23(1):47–66.  
717 Available from: <https://www.ncbi.nlm.nih.gov/pmc/articles/PMC5329090/>
- 718 86. Alvarez-Carbonell D, Garcia-Mesa Y, Milne S, Das B, Dobrowolski C, Rojas R, et al. Toll-like  
719 receptor 3 activation selectively reverses HIV latency in microglial cells. *Retrovirology*  
720 [Internet]. 2017;14(1):9. Available from:  
721 <http://retrovirology.biomedcentral.com/articles/10.1186/s12977-017-0335-8>
- 722 87. Yin C, Zhang T, Qu X, Zhang Y, Putatunda R, Xiao X, et al. In Vivo Excision of HIV-1 Provirus  
723 by saCas9 and Multiplex Single-Guide RNAs in Animal Models. *Mol Ther* [Internet]. 2017

724 May 3 [cited 2018 Aug 16];25(5):1168–86. Available from:  
725 <http://www.sciencedirect.com/science/article/pii/S1525001617301107>

726 88. Dash PK, Kaminski R, Bella R, Su H, Mathews S, Ahooyi TM, et al. Sequential LASER ART  
727 and CRISPR Treatments Eliminate HIV-1 in a Subset of Infected Humanized Mice. *Nat*  
728 *Commun* [Internet]. 2019 Dec 2;10(1):1–20. Available from:  
729 <http://dx.doi.org/10.1038/s41467-019-10366-y>

730 89. Tebas P, Stein D, Tang WW, Frank I, Wang SQ, Lee G, et al. Gene Editing of CCR5 in  
731 Autologous CD4 T Cells of Persons Infected with HIV. *N Engl J Med* [Internet]. 2014 Mar 6  
732 [cited 2019 Nov 15];370(10):901–10. Available from:  
733 <http://www.ncbi.nlm.nih.gov/pubmed/24597865>

734

735

## 736 **Figure Legends**

737 **Figure 1: The cell surface proteins CD147 and CD29 are abundantly and specifically expressed**  
738 **in J-Lat 11.1 cells.**  $1 \times 10^6$  J-Lat cells were stained with antibodies targeting select cell surface  
739 proteins to (A) measure the frequency of marker-positive cells and (B) mean fluorescence  
740 intensity (MFI) of proteins on the cell surface using flow cytometry. The MFI of marker signal  
741 positive cells was normalized to signal positive cells of respective isotype control stained  
742 samples. A representative experiment is summarized in the bar graphs. (C) Gating strategy to  
743 identify human J-Lat cells upon multicolor staining with CD147/CD29-APC (J-Lat cell marker)  
744 and CD45/TER-119/H-2Kd-Pacific Blue (mouse cell marker) *in vitro*. (D) Representative flow  
745 cytometry plots show multicolor staining of single cell suspensions prepared from different  
746 mouse tissues obtained from an untransplanted control animal. Mouse cells were stained,  
747 measured, and analyzed in the same way as *in vitro* J-Lat cells to evaluate specificity and  
748 background signal of human CD29 and CD147 antibodies. (E) Single cell suspensions were  
749 prepared from 8 mouse tissues and three different harvest methods for peripheral blood (PB)  
750 to determine the applicability of the multicolor staining for subsequent engraftment studies.  
751 BM = bone marrow, IEL = intraepithelial lymphocytes, LN = lymph node, PB = peripheral blood,  
752 r.-o. = retro-orbital.

753

754 **Figure 2: Schematic representation of parameters that were examined and optimized to**  
755 **establish the  $\mu$ -Lat model.** J-Lat cell engraftment kinetics, J-Lat cell dosage, irradiation of  
756 recipient mice, and testing of J-Lat cell engraftment in different mouse strains were  
757 investigated.

758 **Figure 3: Optimal engraftment levels of J-Lat cells are achieved 3 weeks post injection in**  
759 **irradiated NSG mice using  $10 \times 10^6$  J-Lat cells for transplantation.** The parameters described in  
760 **Figure 2** were examined and optimized concomitantly by focusing on engraftment levels in the  
761 BM. (A) J-Lat cell engraftment kinetics: Nonirradiated NSG-3GS mice were transplanted with  $5 \times$   
762  $10^6$  J-Lat cells and the BM harvested at indicated time points post cell injection. (B) J-Lat cell  
763 injection dosage: J-Lat cell engraftment levels in the BM of nonirradiated NSG-3GS were  
764 compared using different initial injection cell doses of  $5 \times 10^6$  J-Lat cells (BM harvested 18 days  
765 post cell injection) or  $10 \times 10^6$  J-Lat cells (BM harvested 14 days post cell injection). (C)  
766 Irradiation of recipient mice: NSG-3GS recipient mice were nonirradiated (nonIRR) or irradiated  
767 (IRR) before transplantation of  $10 \times 10^6$  J-Lat cells, and engraftment levels were determined two  
768 weeks post cell transplantation. (D) Mouse strain selection:  $10 \times 10^6$  J-Lat cells were injected  
769 either into irradiated NSG-3GS or irradiated NSG mice and engraftment levels in the BM were  
770 measured 3 weeks post cell injection and 24h post TNF- $\alpha$  treatment. Each dot represents an  
771 individual animal for the respective condition. Each plot represents an independent experiment  
772 with  $n \geq 3$ . P values in (A) were determined using the nonparametric Kruskal-Wallis test with  
773 the uncorrected Dunn's test for multiple comparisons. P values in (B-D) were determined using  
774 an unpaired, two-tailed t-test. A standard  $P < 0.05$  significance threshold was used.

775

776 **Figure 4: J-Lat cells engraft successfully in several tissues in transplanted NSG mice.** (A) Gating  
777 strategy to identify human J-Lat cells in harvested mouse tissues exemplified here with BM. (B)  
778 Representative flow cytometry plots are shown for engraftment levels across tissue sites  
779 observed at necropsy and engraftment levels in PB ( $n = 5$ ) using three different harvest



780 approaches: r.-o. bleeding, tail vein bleeding, and heart bleeding. Bar graphs summarize (C)  
781 frequency, (D) MFI, and (E) number of engrafted J-Lat cells in the respective tissue. Each data  
782 point represents an individual animal. Colors indicate tissues harvested from the same animal.  
783 Error bars show the standard error of the mean (SEM).

784

785 **Figure 5: Engrafted J-Lat cells exhibit low basal levels of GFP expression 3 weeks post cell**  
786 **transplantation.** (A) Gating strategy to identify human J-Lat cells and GFP background signal of  
787 engrafted J-Lat cells in harvested mouse tissues illustrated here with a representative BM  
788 sample. Representative flow cytometry plots are shown for (B) engraftment levels and (C) GFP  
789 background signal across selected tissues observed at necropsy (n = 10). Bar graphs summarize  
790 (D) cell frequency and (E) GFP expression levels of engrafted J-lat cells. Each data point  
791 represents an individual animal. Colors indicate tissues harvested from the same animal. Error  
792 bars show SEM.

793

794 **Figure 6: TNF- $\alpha$  treatment reactivates latent HIV *in vivo* in the  $\mu$ -Lat model.** (A) Schematic  
795 representation of the procedure to test LRAs *in vivo* using the  $\mu$ -Lat model: (1) Mice receiving  
796 cells of interest for transplantation are irradiated 3 hours prior to cell injection. (2) Each mouse  
797 receives  $10 \times 10^6$  J-Lat cells via intravenous injection. (3) Three weeks post injection (21 days)  
798 mice are treated for 24h with LRAs of interest, followed by (4) necropsy, tissue harvest and  
799 processing, and preparation of single-cell suspensions. (5) Single-cell suspensions are stained  
800 for J-Lat and mouse cell markers to assess engraftment levels via flow cytometry. Reactivation  
801 of latent provirus following LRA treatment is assessed by measuring GFP expression via flow

802 cytometry (the J-Lat provirus contains an LTR-driven GFP reporter). (B) J-Lat cells were treated  
803 *in vitro* for 24h with 0.5% DMSO (vehicle control), 20 ng/ $\mu$ l TNF- $\alpha$ , 20 nM PMA/1  $\mu$ M Ionomycin  
804 (positive control) or left untreated (negative control) to assess viral reactivation based on GFP  
805 expression (n = 5). (C) J-Lat engraftment levels were measured 24h post tail vein injection of 20  
806  $\mu$ g TNF- $\alpha$  (n = 9) or vehicle control (PBS, n = 10) in BM, spleen, lung and PB of mice. (D)  
807 Representative flow cytometry plots demonstrating the effect of vehicle control (top panel) or  
808 TNF- $\alpha$  treatment (bottom panel) on viral reactivation (GFP expression) in engrafted J-Lat cells.  
809 The induction of GFP expression among engrafted J-Lat cells across tissues is summarized as (E)  
810 frequency of GFP+ cells and (F) GFP MFI. One-way ANOVA and uncorrected Fisher's LSD for  
811 multiple comparisons was used to analyze (B) *in vitro* reactivation data, and a mixed effects  
812 model and uncorrected Fisher's LSD for multiple comparisons was used to analyze (C) *in vivo*  
813 engraftment and (E-F) viral reactivation data. Colors indicate specific animals and tissues  
814 obtained from the same animal. Error bars show SEM.

# Figure 1

**A**

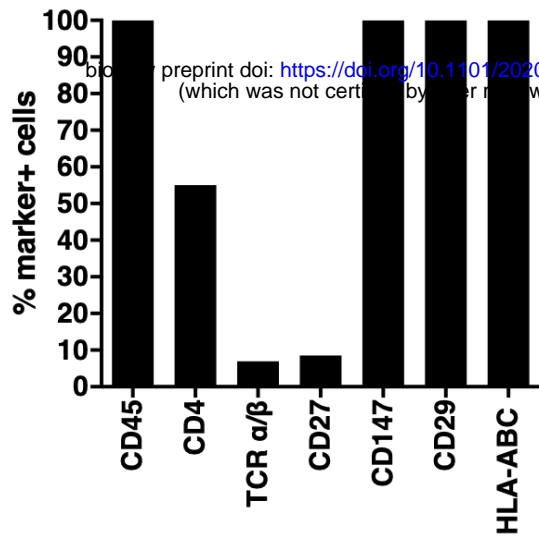

**B**

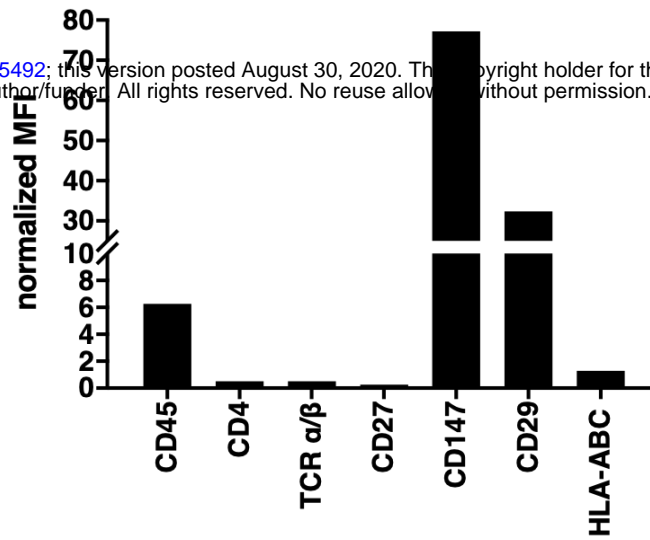

**C**

J-Lat cells *in vitro*

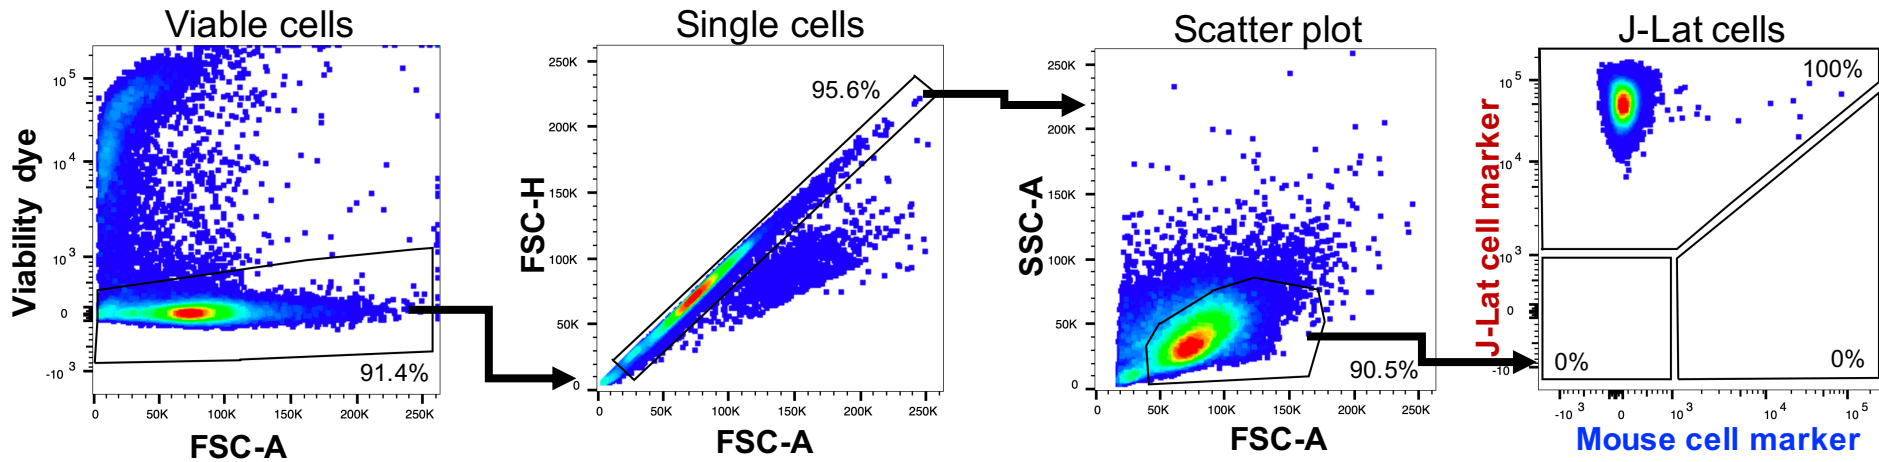

**D**

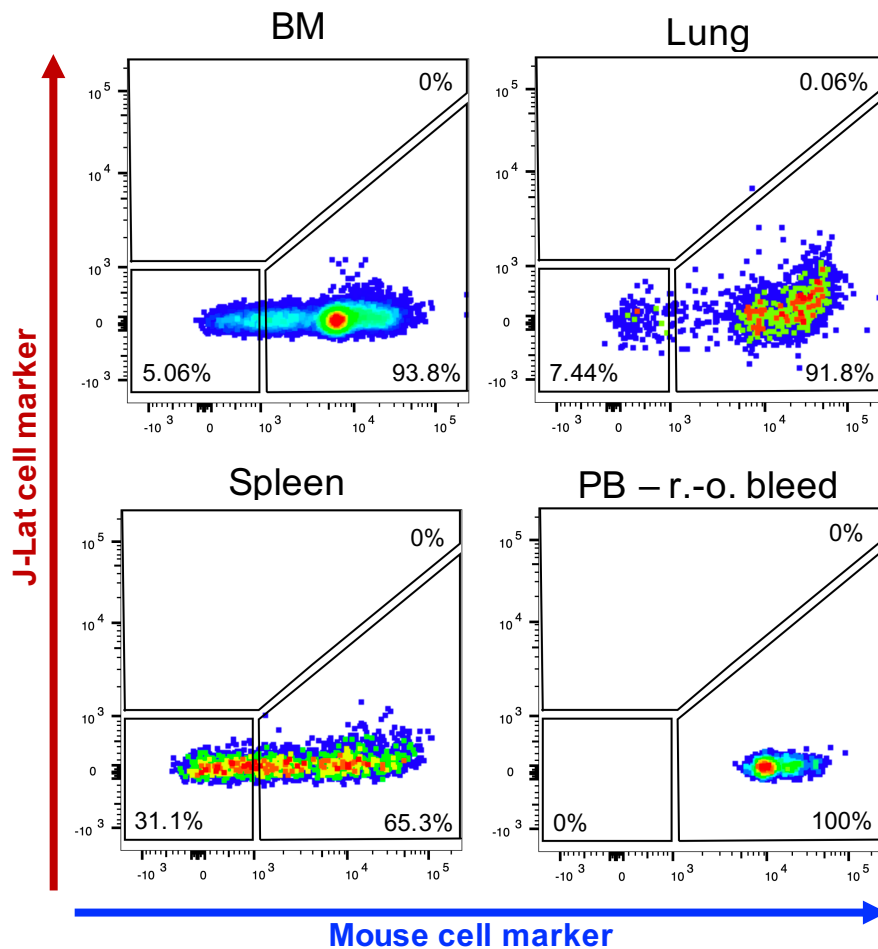

**E**

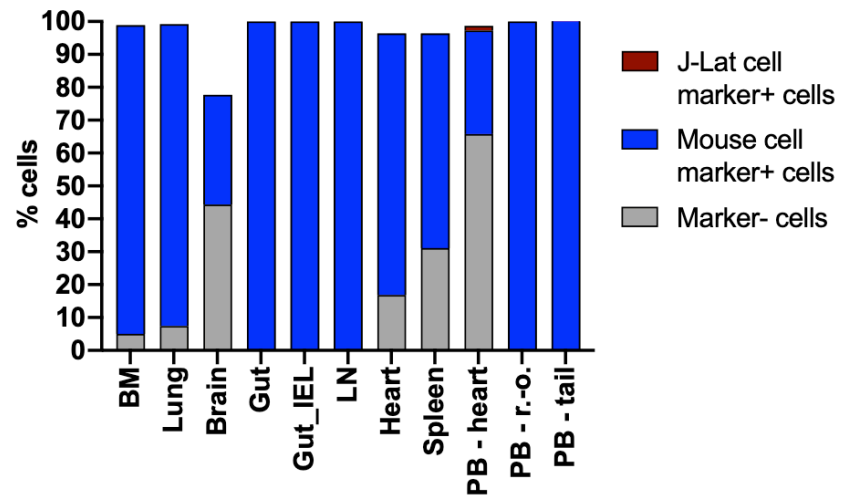

# Model optimization

# Figure 2

## Engraftment kinetics

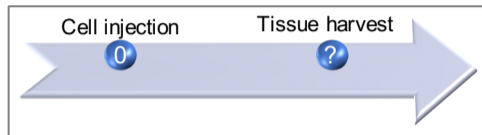

## Cell dosage

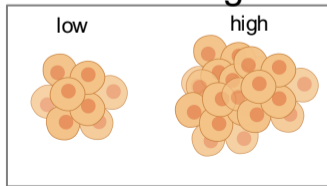

## Irradiation

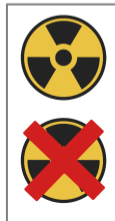

## Mouse strain

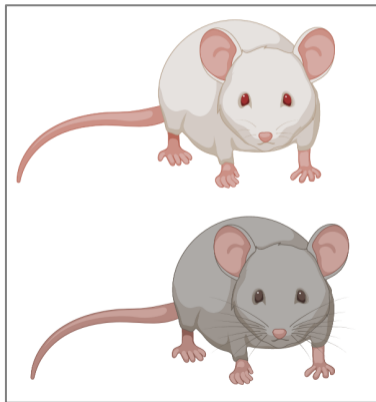

## Tissue harvest

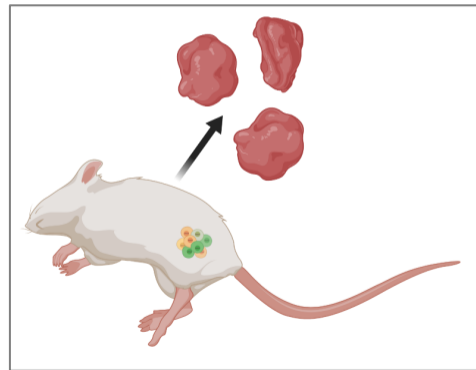

Figure 3

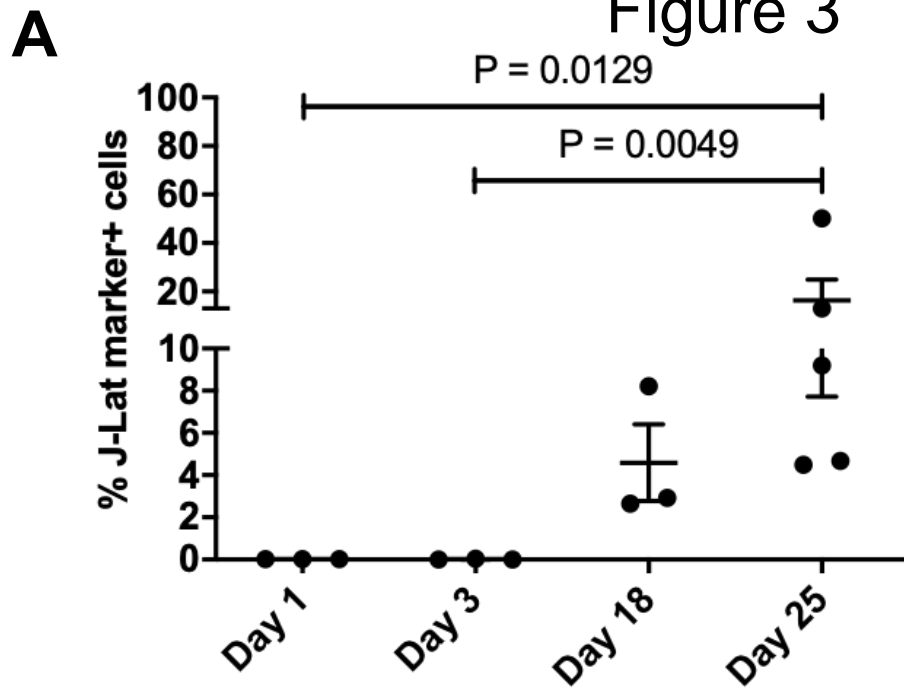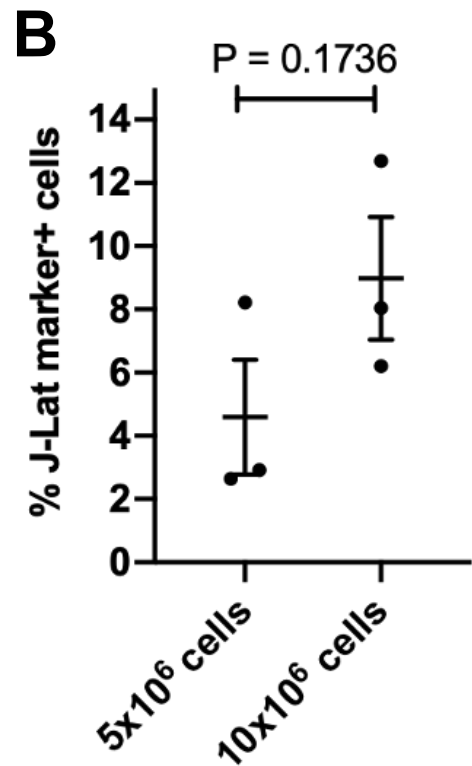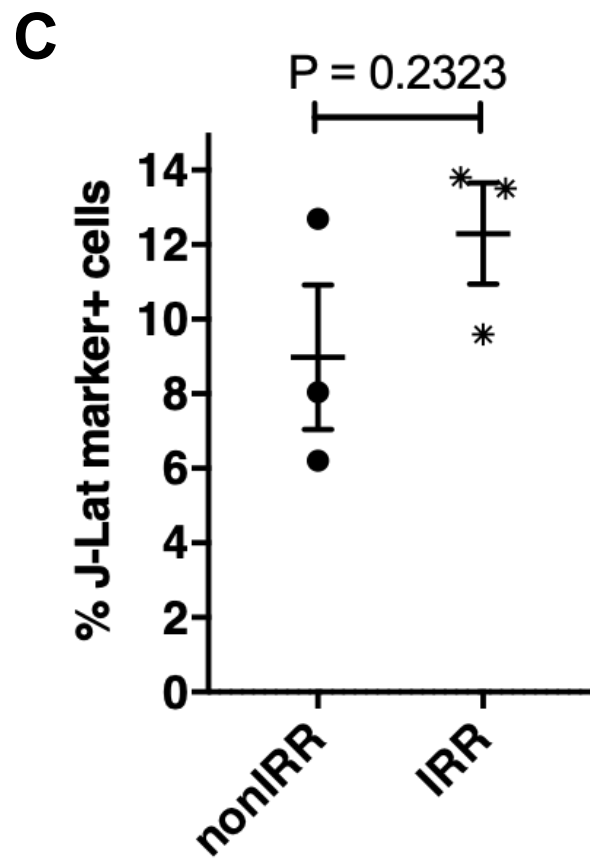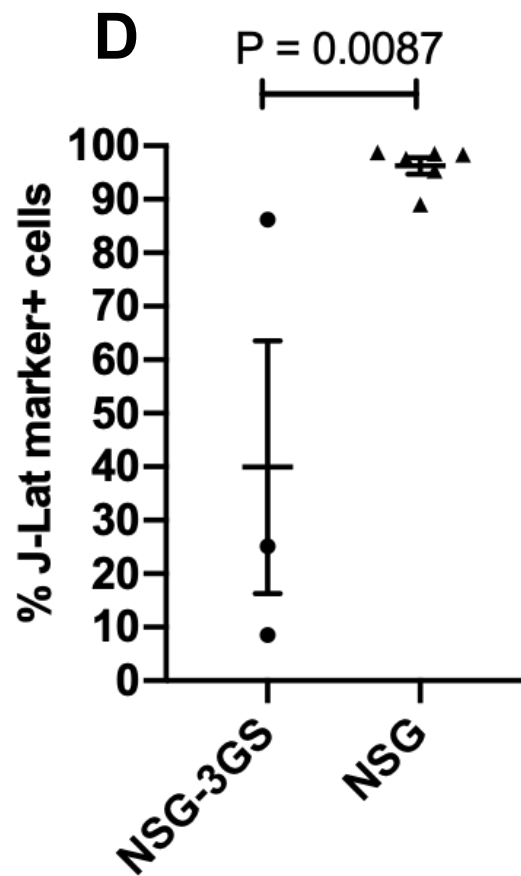

**A**

bioRxiv preprint doi: <https://doi.org/10.1101/2020.02.18.955492>; this version posted August 29, 2020. The copyright holder for this preprint (which was not certified by peer review) is the author/funder. All rights reserved. No reuse allowed without permission.

# Figure 4 BM

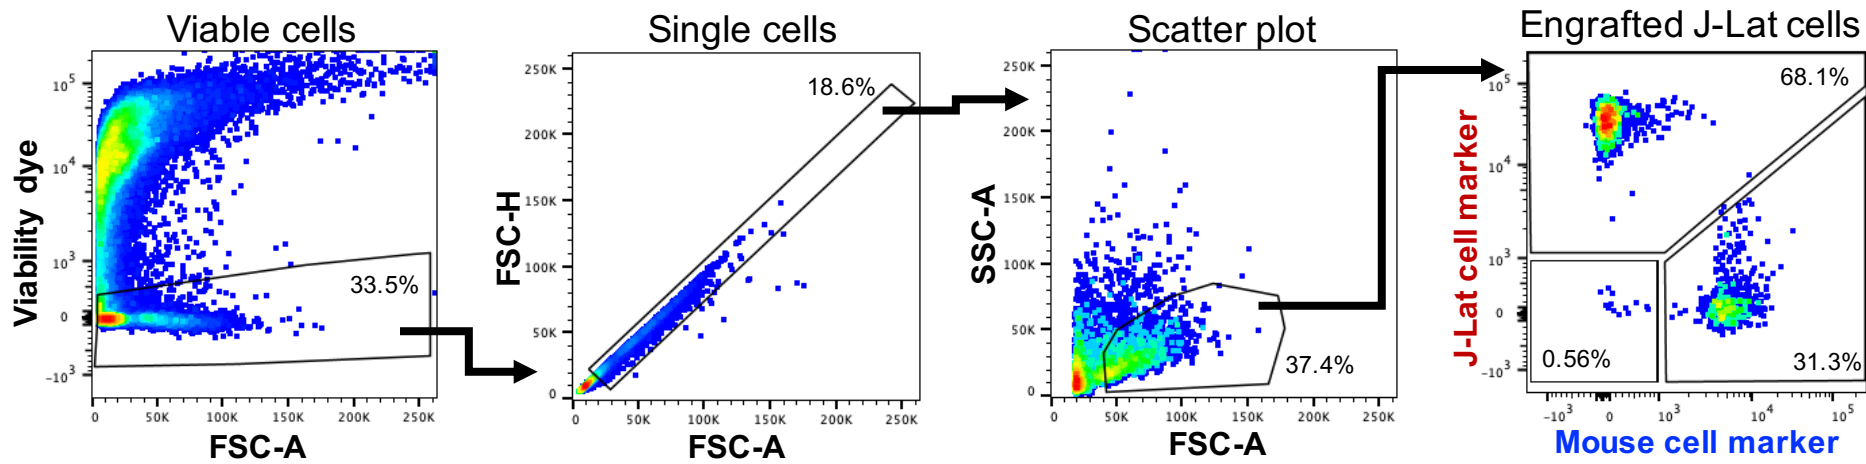**B**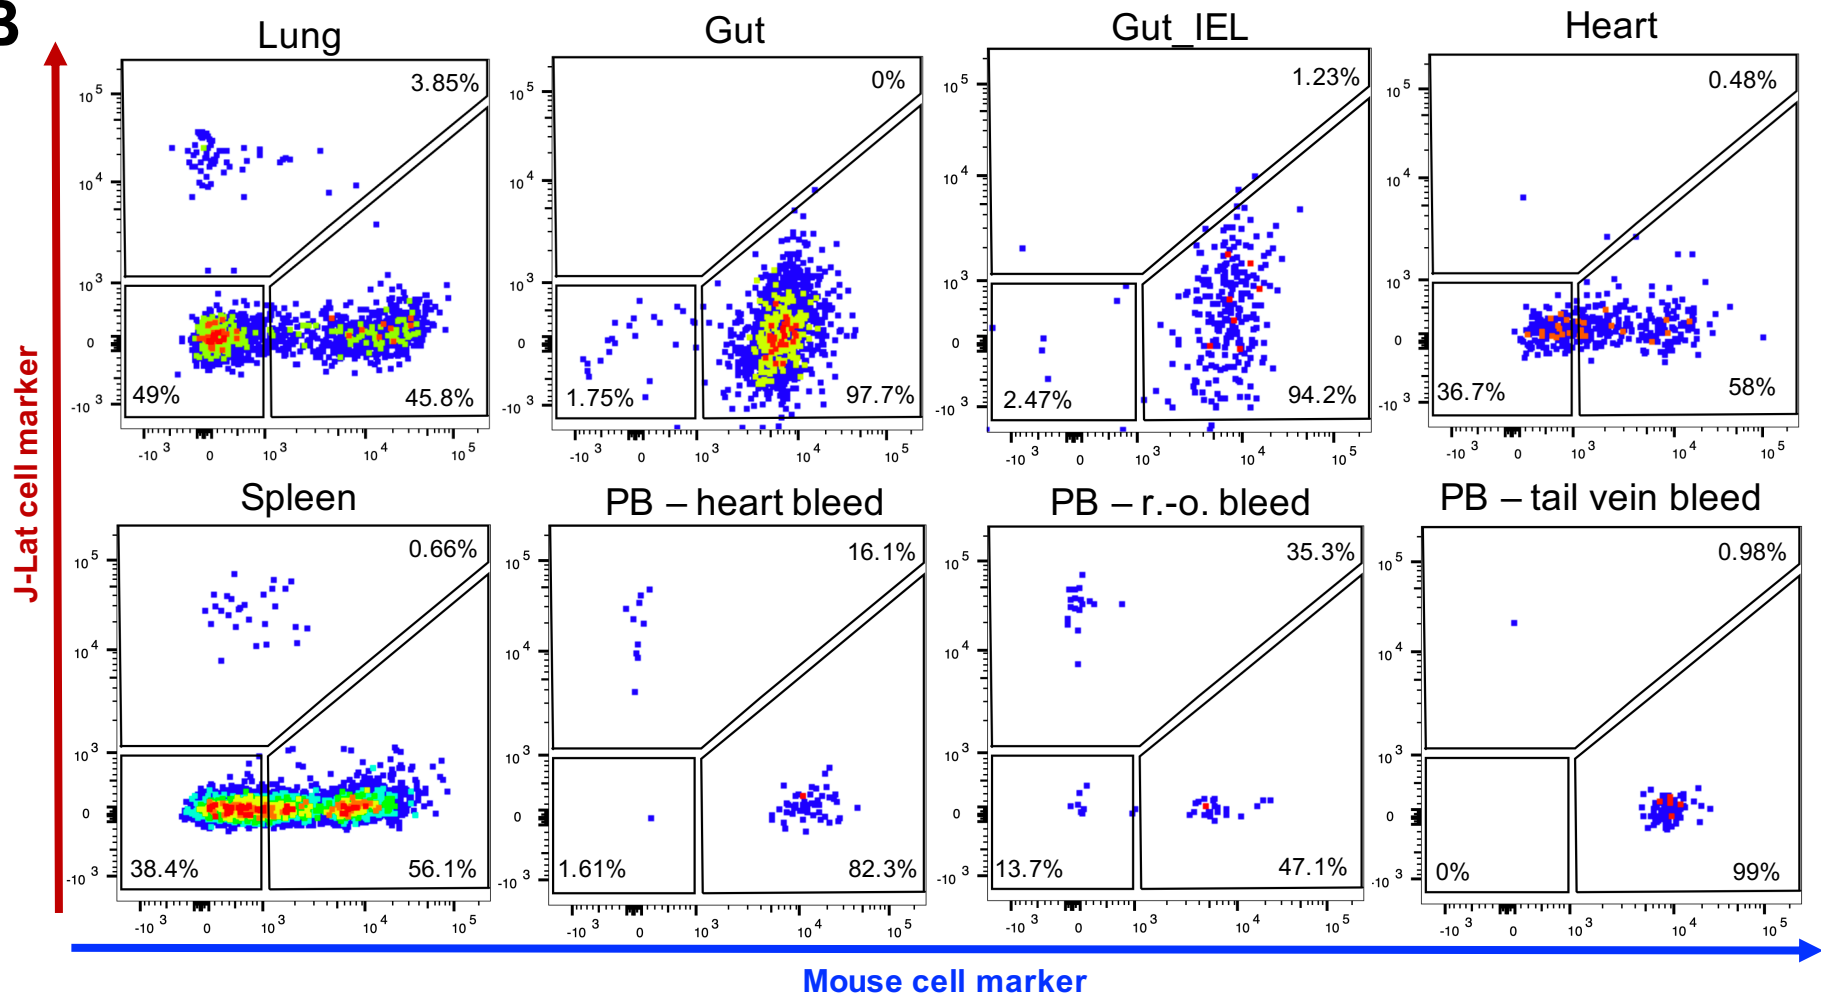**C**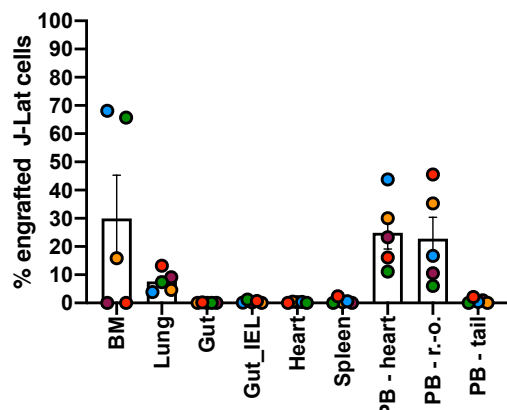**D**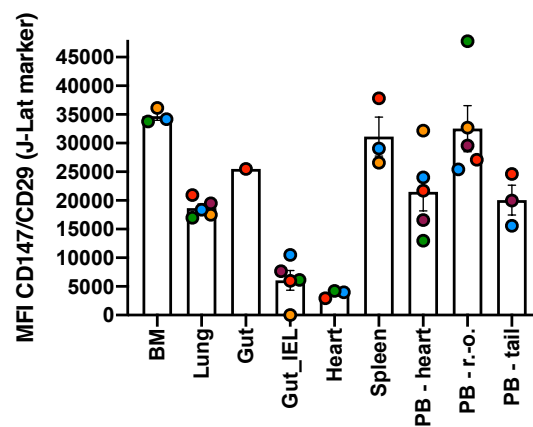**E**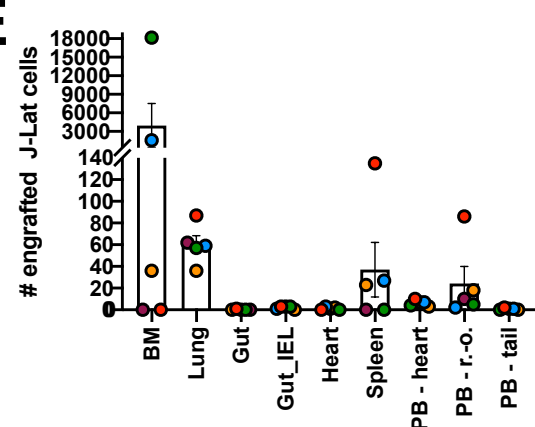

# Figure 5

BM

**A**

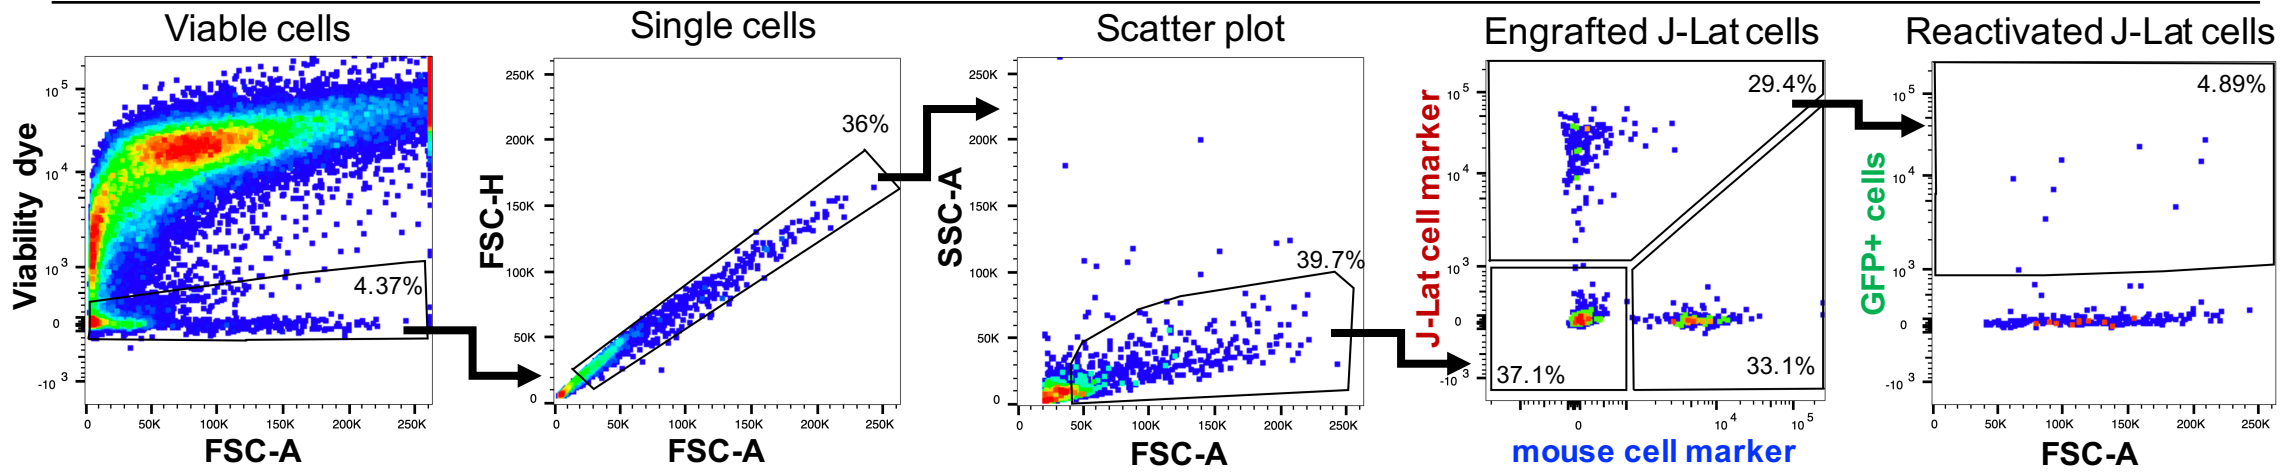

**B**

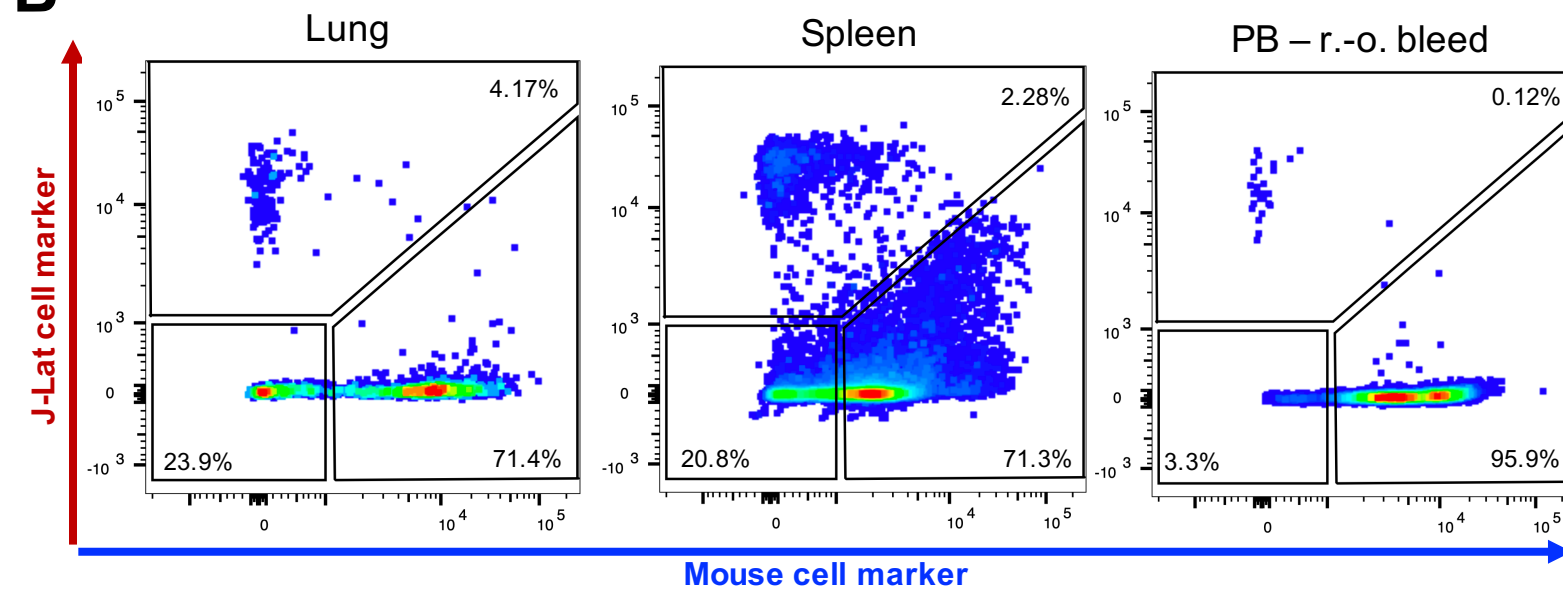

**D**

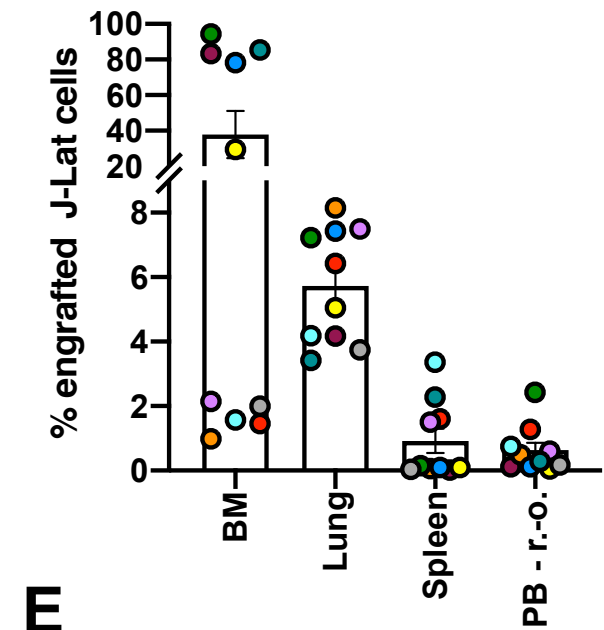

**C**

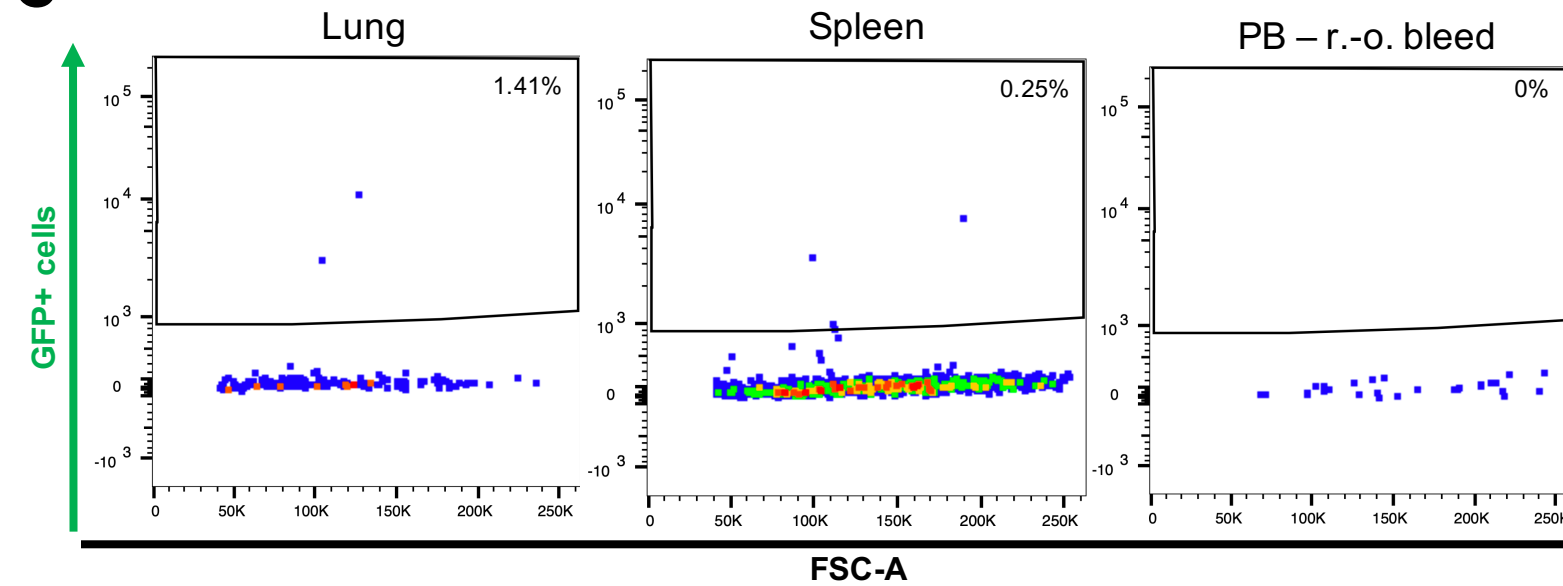

**E**

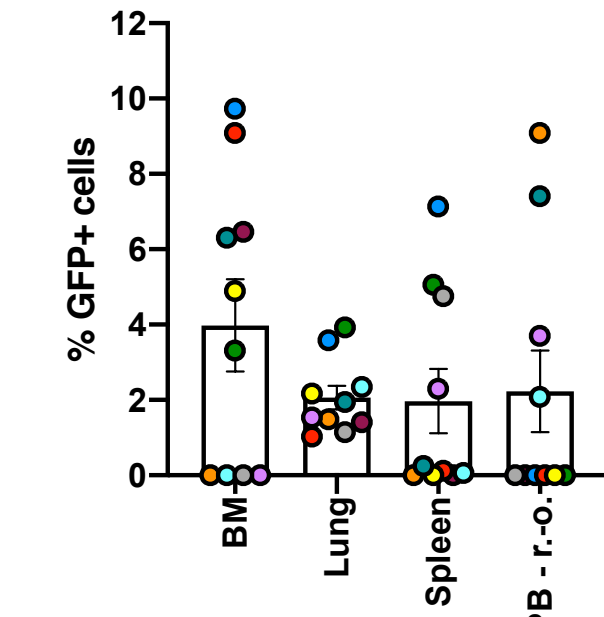

# Figure 6

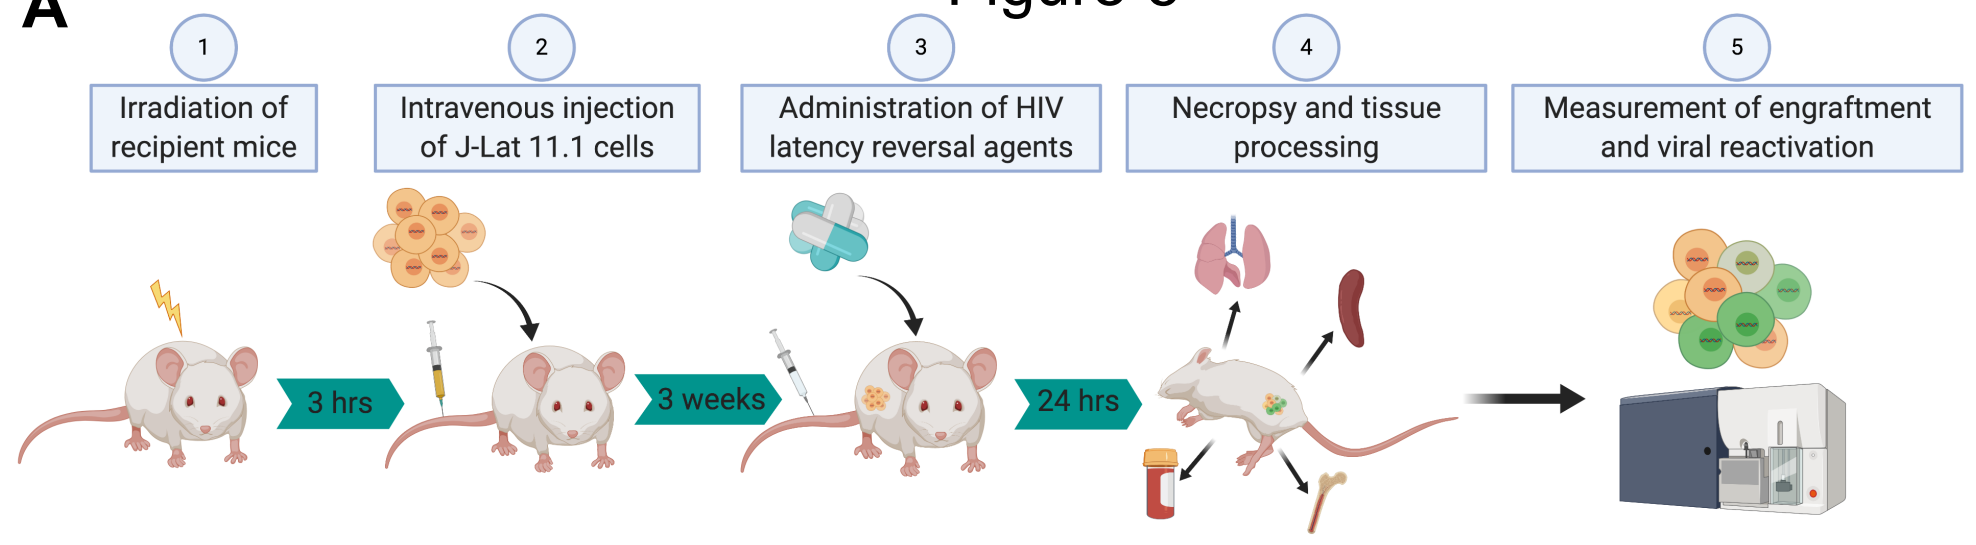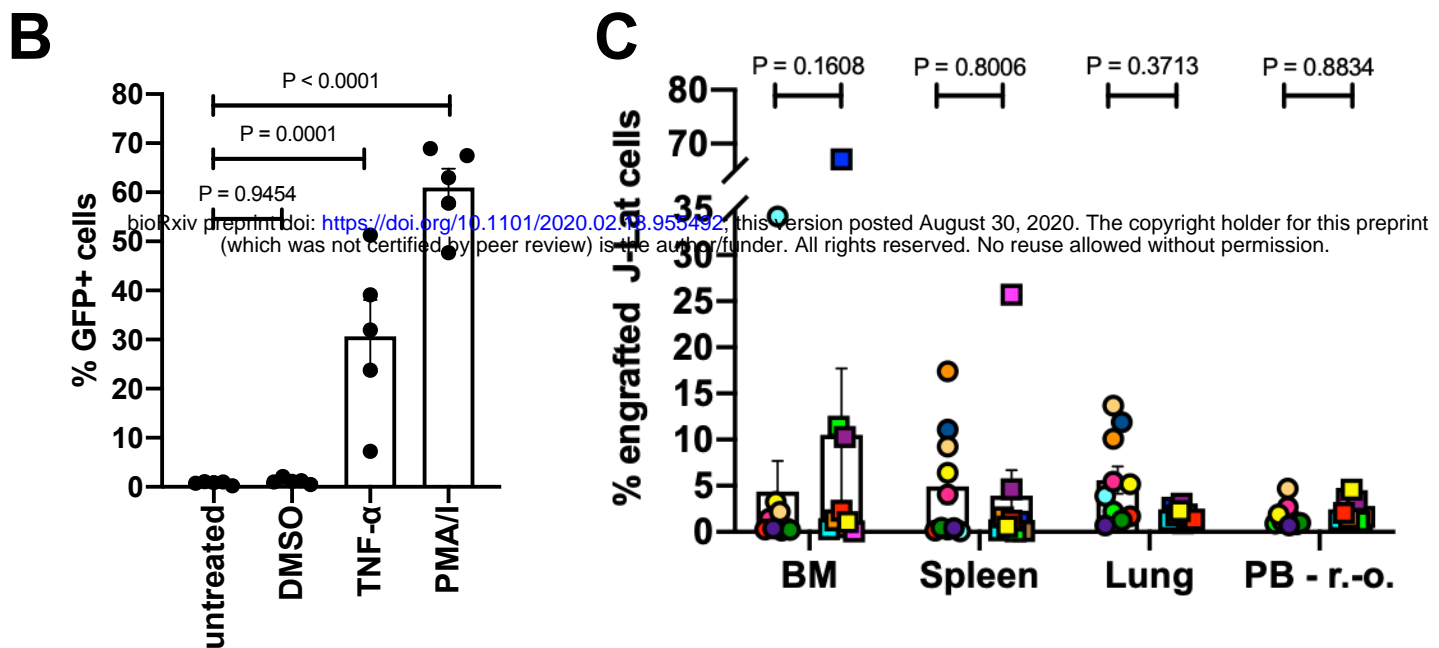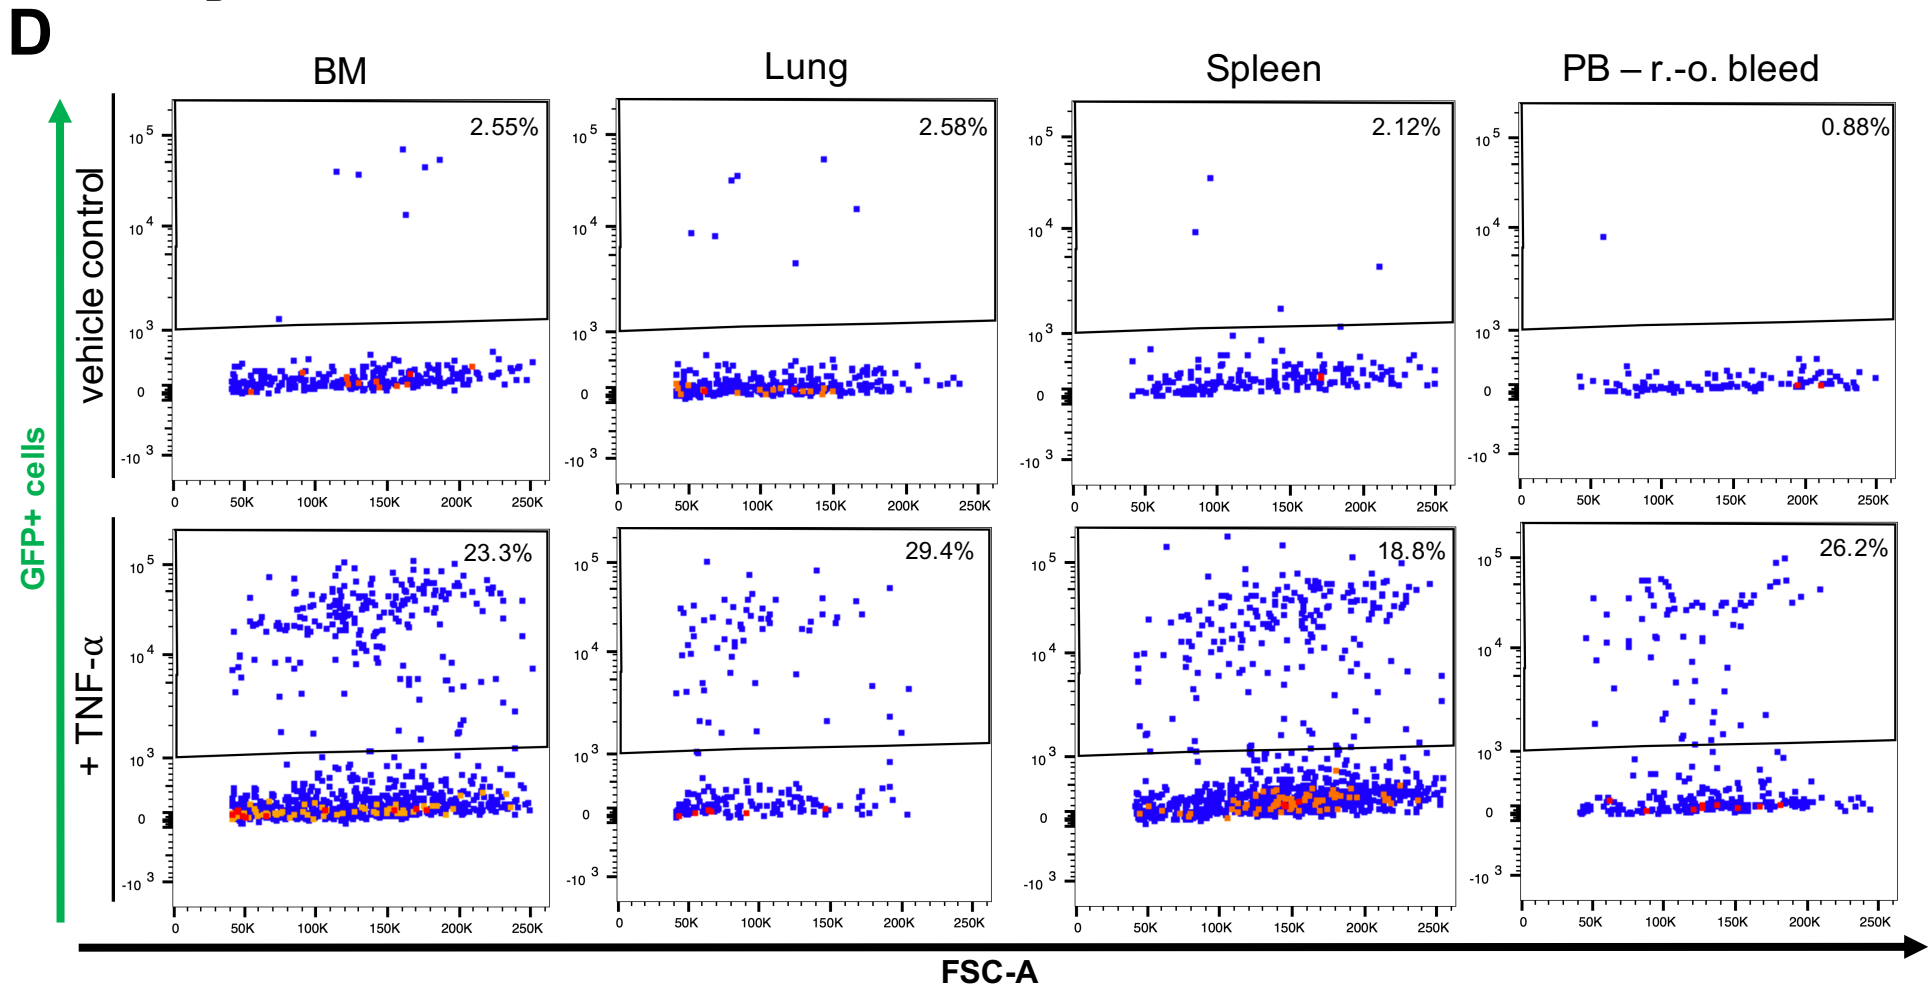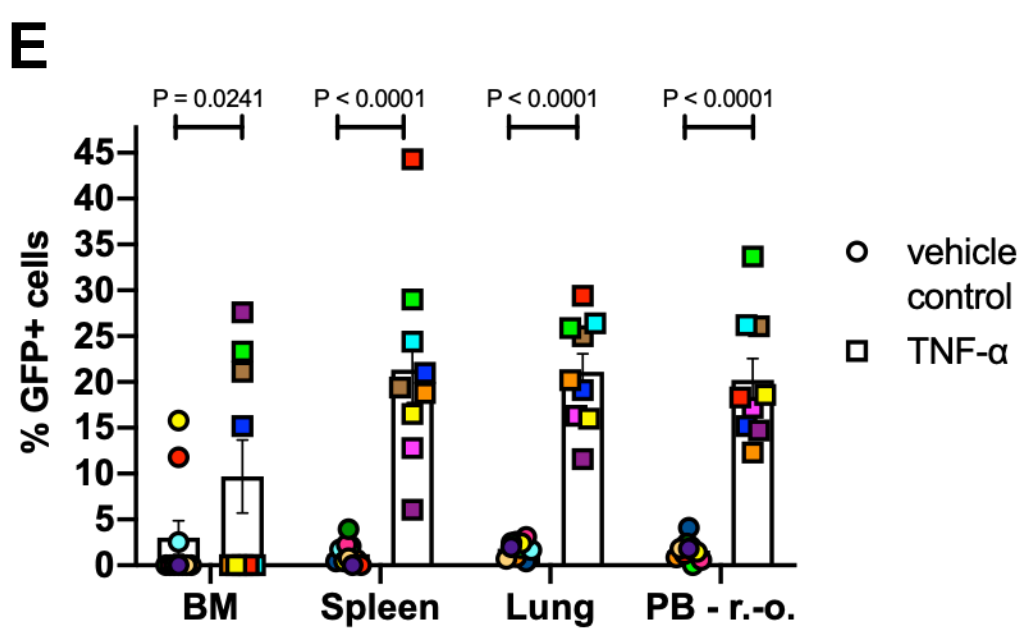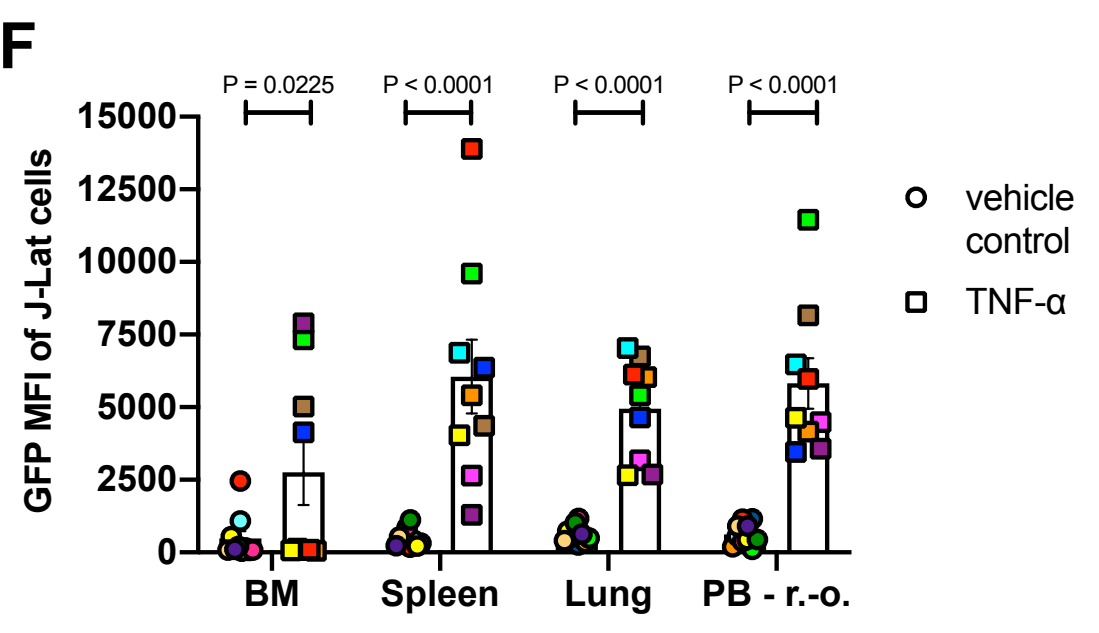

Source: https://www.biorxiv.org/content/biorxiv/early/2020/08/30/2020.02.18.955492.full.pdf
